1 Antineoplastic kinase inhibitors: a new class of potent anti-amoebic compounds

2 Antineoplastic kinase inhibitors against *Entamoeba histolytica*

3

4

5 Conall Sauvey<sup>1</sup>, Gretchen Ehrenkauf<sup>2</sup>, Da Shi<sup>1</sup>, Anjan Debnath<sup>1</sup>, Ruben Abagyan<sup>1\*</sup>

6

7 <sup>1</sup>Center for Discovery and Innovation in Parasitic Diseases, Skaggs School for Pharmacy and

8 Pharmaceutical Sciences, University of California - San Diego, La Jolla, California, USA

9 <sup>2</sup>Division of Infectious Diseases, Department of Internal Medicine, Stanford University School of

10 Medicine, Stanford, California, USA

11

12 \* Corresponding author

13 Email: rabagyan@health.ucsd.edu

14

15

## 16 **Abstract**

17 *Entamoeba histolytica* is a protozoan parasite which infects approximately 50 million

18 people worldwide, resulting in an estimated 70,000 deaths every year. Since the 1960s *E.*

19 *histolytica* infection has been successfully treated with metronidazole. However, drawbacks to

20 metronidazole therapy exist, including adverse effects, a long treatment course, and the need

21 for an additional drug to prevent cyst-mediated transmission. *E. histolytica* possesses a kinome

22 with approximately 300 - 400 members, some of which have been previously studied as

23 potential targets for the development of amoebicidal drug candidates. However, while these

24 efforts have uncovered novel potent inhibitors of *E. histolytica* kinases, none have resulted in

25 approved drugs. In this study we took the alternative approach of testing a set of twelve

26 previously FDA-approved antineoplastic kinase inhibitors against *E. histolytica* trophozoites *in*  
27 *vitro*. This resulted in the identification of dasatinib, bosutinib, and ibrutinib as amoebicidal  
28 agents at low-micromolar concentrations. Next, we utilized a recently developed computational  
29 tool to identify twelve additional drugs with human protein target profiles similar to the three  
30 initial hits. Testing of these additional twelve drugs led to the identification of ponatinib,  
31 neratinib, and olmutinib were identified as highly potent, with EC<sub>50</sub> values in the sub-micromolar  
32 range. All of these six drugs were found to kill *E. histolytica* trophozoites as rapidly as  
33 metronidazole. Furthermore, ibrutinib was found to kill the transmissible cyst stage of the model  
34 organism *E. invadens*. Ibrutinib thus possesses both amoebicidal and cysticidal properties, in  
35 contrast to all drugs used in the current therapeutic strategy. These findings together reveal  
36 antineoplastic kinase inhibitors as a highly promising class of potent drugs against this  
37 widespread and devastating disease.

38

## 39 **Author Summary**

40 Every year, nearly a hundred thousand people worldwide die from infection by the  
41 intestinal parasite *Entamoeba histolytica*, despite the widespread availability of metronidazole  
42 as a treatment. Here we report that six anticancer drugs of the kinase inhibitor class possess  
43 potent anti-amoebic properties, with one of them killing both actively dividing parasite and its  
44 transmissible cysts. These anticancer kinase inhibitors, including the dual-purpose drug with  
45 both amoebicidal and cysticidal activities may be used to treat amoebiasis, especially in cancer  
46 patients or in life-threatening brain- and liver-infecting forms of the disease.

47

## 48 **Introduction**

49 *Entamoeba histolytica* is a parasitic amoeba which infects an estimated 50 million  
50 people worldwide, resulting in around 70,000 deaths per year (1). *E. histolytica* infection is

51 known as amoebiasis and primarily affects the intestinal tract in humans, most commonly  
52 causing symptoms such as abdominal pain, bloody diarrhea, and colitis (2). In rare cases the  
53 infection spreads to other organs such as the liver and brain, and in serious cases results in  
54 patient death (2). *E. histolytica*'s life cycle consists of a trophozoite vegetative stage which  
55 matures in its host to an infective cyst stage. The cyst stage is excreted in the host's feces,  
56 infecting a new host when ingested via a route such as drinking contaminated water. In the  
57 majority of cases where *E. histolytica* is ingested it lives asymptotically in the human host's  
58 intestinal tract. Symptoms can develop when compromise of the mucosal layer allows it to come  
59 into contact with the intestinal wall, at which point it invades the wall and surrounding tissue  
60 causing characteristic 'flask-shaped ulcers' (3). Due to this mode of transmission *E. histolytica*  
61 disproportionately affects populations experiencing sanitation problems associated with low  
62 socioeconomic status (2, 4, 5). Malnutrition is also known to be a major risk factor for  
63 amoebiasis, especially in children (6).

64 *E. histolytica* infection is currently treated with the 5-nitroimidazole drug metronidazole,  
65 which has been in use since the 1960s and has widespread use as a treatment against  
66 anaerobic microbial infection (7, 8). However, while successful, metronidazole is not a perfect  
67 solution to *E. histolytica* infection, with a few particularly notable existing issues. One of these is  
68 problems with lack of patient compliance with the full course of treatment, leading to relapses  
69 and increased disease spread (7). This is possibly due to factors such as drug adverse effects  
70 or the need for continued dosing past the resolution of disease symptoms (9, 10). Another issue  
71 is metronidazole's inability to kill the infective cyst stage of *E. histolytica*. Because of this, along  
72 with its complete absorbance from the intestines, metronidazole must be followed by a  
73 secondary luminal amoebicide such as paromomycin to prevent spread of the disease (11, 12).  
74 Also concerning is the potential for the emergence of resistance to metronidazole, which has  
75 been previously observed in the laboratory (13). When considered together, these factors  
76 comprise an unmet need for alternative amoebiasis therapies.

77           Several efforts to find such alternative therapies have been undertaken over the years,  
78 including the recent development of the antirheumatic drug auranofin as a promising potential  
79 treatment for amoebiasis (14-16). One noteworthy direction of anti-amoebic drug research has  
80 been the efforts of multiple groups to inhibit *E. histolytica* by targeting specific kinase proteins  
81 believed to be critical to the parasite's functioning (17-19). This approach has often involved  
82 computational modeling and *in-silico* screening of compounds against the kinases of interest,  
83 followed by *in-vitro* tests of top-scoring molecules (17). These efforts have resulted in both the  
84 discovery of potent new hit compounds as well as validation of the previously discovered activity  
85 of auranofin (17). However, despite these successes, no new clinical treatments have yet been  
86 produced.

87           Importantly, one promising area currently unexplored by such studies is the potential of  
88 existing human kinase inhibitor drugs. A particular advantage of these drugs is the rich array of  
89 data available regarding their activity profiles against human target proteins, which allows for the  
90 mapping and utilization of their complex multi-target pharmacology. Such maps could in turn be  
91 projected into the *E. histolytica* proteome and used to infer potential antiamoebic drug activity by  
92 identifying drugs with similar target profiles to known active compounds. We have previously  
93 published a computational tool capable of such mapping for antineoplastic drugs, including a  
94 large number of kinase inhibitors (20). We describe here the use of this tool to prioritize  
95 molecules for screening against *E. histolytica* trophozoites based on initial hits from a small  
96 primary screen. In total, 6 antineoplastic kinase inhibitors (AKIs) were found to have potent and  
97 rapid anti-amoebic activity. The results of these experiments demonstrate the promise of using  
98 target-based analysis to leverage compounds with multi-target pharmacology against a human  
99 parasite.

100

## 101 **Materials and Methods**

102

### 103 ***E. histolytica* cell culture**

104 *E. histolytica* strain HM-1:IMSS trophozoites were maintained in 50ml culture flasks  
105 (Greiner Bio-One) containing TYI-S-33 media, 10% heat-inactivated adult bovine serum  
106 (Sigma), 1% MEM Vitamin Solution (Gibco), supplemented with penicillin (100 U/mL) and  
107 streptomycin (100 µg/mL) (Omega Scientific) (14).

108

### 109 **Compounds**

110 Compounds for screens were purchased from Fisher Scientific and Millipore-Sigma.

111

### 112 **Cell viability screen to determine drug potency against *E. histolytica***

113 Following a previously-published approach (14) *E. histolytica* trophozoites maintained in  
114 the logarithmic phase of growth were seeded into 96-well plates (Greiner Bio-One) at 5,000  
115 cells/well to a total volume of 100 µl/well. 8- or 16-point two-fold dilution series of the treatment  
116 compounds were prepared, beginning at a maximum final treatment concentration of 50 µM. 0.5  
117 µl of each drug concentration was added to triplicate wells for each treatment group. 0.5 µl of  
118 DMSO was used as a negative control, and 0.5 µl of 10 mM metronidazole dissolved in DMSO  
119 was used as a positive control, giving a final concentration of 50 µM. Alternatively, wells with  
120 only media were used as a negative control. The plates were placed in GasPak EZ (Becton-  
121 Dickinson) bags and incubated at 37°C for 48hr. Plates were removed and 50 µl of CellTiter-Glo  
122 (Promega) was added to each well. Plates were shaken and incubated in darkness for 20  
123 minutes and the luminescence value of each well was read by a luminometer (EnVision,  
124 PerkinElmer). Percent inhibition was calculated by subtracting the luminescence values of each  
125 experimental data point from the average minimum signal obtained from positive control values

126 and dividing by the difference between the average maximum signal negative control and the  
127 positive control. The resulting decimal value was then multiplied by 100 to give a percentage.

128

### 129 **Determination of drug EC<sub>50</sub> values *in vitro* over time**

130 Effects of different concentrations of compounds on *E. histolytica* trophozoite cell viability  
131 were determined as described in the previous section at a series of timepoints ranging from 6  
132 hours to 48 hours following drug administration. EC<sub>50</sub> values were calculated at each timepoint  
133 as previously described.

134

### 135 **Determination of varying drug exposure time effects**

136 *E. histolytica* trophozoites were treated with either 5µM ponatinib, 5µM neratinib, 5µM  
137 olmutinib, or 10µM metronidazole in replicates of 4 wells in 96-well plates. At timepoints ranging  
138 from 2 to 48 hours, wells were aspirated, washed once with fresh media, and refilled with fresh  
139 media. At 48 hours, percentage trophozoite inhibition was measured using luminescence and  
140 calculated as described previously for each timepoint.

141

### 142 **Identification of desired target profile of active drugs**

143

144 A desired target profile of active drugs was generated using the “Multi-drug target finder”  
145 tool in the CancerDrugMap ([http://ruben.ucsd.edu/dnet/maps/drug\\_find.html](http://ruben.ucsd.edu/dnet/maps/drug_find.html)) (20). Drugs that  
146 were active (dasatinib, bosutinib, ibrutinib...) and inactive (nilotinib, imatinib...) in the *E.*  
147 *histolytica* proliferation assay were inputs, respectively. Drug-target interaction activity data for  
148 the tool were collected from multiple sources as previously described, including ChEMBL,  
149 PubChem, and literature sources (20). Drug targets were ranked based on the drug-target  
150 activity data and using the following equations and assembled into the final anti-amoebic  
151 activity-associated profile.

152

153

$$\text{Score of target } S = \sum_{\text{drugs}} \text{weight} \times (pAct - 4)$$

154 Where

155

156

$$pAct = -\log( IC50/Kd/Ki )$$

157

158 For active drugs:  $weight = 1$

159 For inactive drugs:  $weight = -0.6 \times \sqrt{\frac{\text{number of active drugs}}{\text{number of inactive drugs}}}$

160

### 161 **Identification of drugs with desired target profile**

162

163 A list of drugs with target profiles matching the desired target profile was generated with

164 the “Multi-target drug finder” tool in CancerDrugMap

165 ([http://ruben.ucsd.edu/dnet/maps/tar\\_find.html](http://ruben.ucsd.edu/dnet/maps/tar_find.html)). The desired target profiles generated above

166 were input correspondingly. Resulting cancer drugs were ranked based on the drug-target

167 activity and the following equations.

168

169

$$\text{Score of drug } S = \sum_{\text{target}} \text{weight} \times (pAct - 4)$$

170 Where

171

172

$$pAct = -\log( IC50/Kd/Ki )$$

173

174 For targets to hit:  $weight = 1$

175 For targets to avoid:  $weight = -0.6 \times \sqrt{\frac{\text{number of wanted targets}}{\text{number of unwanted targets}}}$

176

177 Top-ranking drugs were then selected for further testing.

178

### 179 **Identification of potential targets of active drugs in the *E. histolytica* genome**

180 15 top ranking human protein targets (YES1, ABL1, BTK, BMX, LCK, HCK, FGR, BLK, ERBB4,

181 LYN, FYN, SRC, CSK, ABL2, and FRK) from the identified desired target profile were searched

182 against the *E. histolytica* genome downloaded from

183 ([https://amoebadb.org/common/downloads/Current\\_Release/EhistolyticaHM1IMSS/](https://amoebadb.org/common/downloads/Current_Release/EhistolyticaHM1IMSS/)). Human  
184 protein sequences were downloaded from (uniprot.org) and the annotated kinase domains of  
185 each protein were compiled into a single file. Full gapped optimal sequence alignments with  
186 zero end gap penalties (ZEGA) were performed between the kinase domain sequences of the  
187 15 targets and the *E. histolytica* genome. The significance of each alignment was assessed  
188 according to a number of residue substitution matrices as a pP value (pP =  $-\log(\text{P-value})$ ) (21).  
189 *E. histolytica* genes with pP over 10, namely the P-value of the alignment lower than  $10^{-10}$  were  
190 selected as potential targets. A network map of the 15 top ranking human genes and  
191 homologous *E. histolytica* genes was generated with Graphviz neato, with edges corresponding  
192 to the pP values between human and *E. histolytica* genes.

193

#### 194 **Cyst killing assay**

195 For assays on mature cysts, a transgenic *E. invadens* line stably expressing luciferase  
196 (CK-luc) was used (22). Mature cyst viability assay was performed as described previously (16).  
197 Parasites were induced to encyst by incubation in encystation media (47% LG) (23). After 72 h,  
198 parasites were washed once in distilled water and incubated at 25°C for 4-5 h in water to lyse  
199 trophozoites. Purified cysts were pelleted, counted to ensure equal cyst numbers, and  
200 resuspended in encystation media at a concentration of  $1-5 \times 10^5$  cells per ml. One ml  
201 suspension per replicate was transferred to glass tubes containing encystation media and drug  
202 or DMSO, then incubated at 25°C for 72 h. On the day of the assay, cysts were pelleted and  
203 treated once more with distilled water for 5 h to lyse any trophozoites that had emerged during  
204 treatment. Purified cysts were then resuspended in 75  $\mu\text{l}$  Cell Lysis buffer (Promega) and  
205 sonicated for  $2 \times 10$  seconds to break the cyst wall. Luciferase assay was performed using the  
206 Promega luciferase assay kit according to the manufacturer's instructions. Assays were  
207 performed on equal volume of lysate (35  $\mu\text{l}$ ) and not normalized to protein content. Effect of the



208 drug was calculated by comparison to DMSO control, after subtraction of background signal.

209 Significance of drug effects was calculated using a one-tailed T-test.

210

## 211 **Results**

212

### 213 **Screen of antineoplastic kinase inhibitors against *E. histolytica* trophozoites**

214 In order to identify anti-amoebic activity among antineoplastic kinase inhibitors, a selection of 12

215 drugs was screened against *E. histolytica* trophozoites *in vitro*. All compounds tested were FDA-

216 approved cancer chemotherapy drugs designed to inhibit human kinase proteins as their

217 mechanism of action. *E. histolytica* trophozoites were seeded into 96-well plates along with a

218 serially-diluted range of drug concentrations. Trophozoites were incubated for 48 hours, after

219 which the surviving cell amount was determined using a luciferase-based cell viability assay.

220 Percent inhibition of trophozoite growth was calculated for each treatment well in comparison

221 with vehicle-only negative controls representing 0% inhibition, and media-only or metronidazole-

222 treated positive controls representing 100% inhibition. From this data EC<sub>50</sub> values were

223 calculated for each respective drug (Table 1). Out of the 12 drugs tested, ibrutinib, dasatinib,

224 and bosutinib all were found to possess EC<sub>50</sub> values similar to or lower than the EC<sub>50</sub> values of

225 of 2-5 μM for the currently used drug metronidazole (Fig 1). Based on these results we

226 concluded that antineoplastic kinase inhibitor drugs are capable of potent inhibition of *E.*

227 *histolytica* and determined that further analysis and refinement was warranted in order to

228 discover even more potent drugs in the same class.

229

230

231 **Table 1. Results of primary screen of AKI drugs against *E. histolytica* trophozoites** Color

232 scale indicates drug potency: darker blue = more potent, lighter blue = less potent. Anti-amoebic

233 activity classified based on EC<sub>50</sub> value as: Very high (0.001 - 0.999 μM), High (1.000 - 4.999  
234 μM), Moderate (5.000 - 9.999 μM), Low (10.000 - 19.999 μM), Very low (20.000 - 99.999 μM), or  
235 None (EC<sub>50</sub> > 100.000 μM).

| Drug name   | EC <sub>50</sub> (μM) | Anti-amoebic activity |
|-------------|-----------------------|-----------------------|
| Ibrutinib   | 0.98                  | Very high             |
| Dasatinib   | 1.57                  | High                  |
| Bosutinib   | 1.94                  | High                  |
| Nilotinib   | 8.22                  | Moderate              |
| Gefitinib   | 8.52                  | Moderate              |
| Sunitinib   | 10.09                 | Low                   |
| Afatinib    | 11.69                 | Low                   |
| Crizotinib  | 12.83                 | Low                   |
| Erlotinib   | 42.07                 | Very low              |
| Dabrafenib  | 55.18                 | Very low              |
| Vemurafenib | >100                  | None                  |
| Imatinib    | >100                  | None                  |

236

237

238 **Fig 1. EC<sub>50</sub> determination of antineoplastic kinase inhibitors against *E. histolytica***

239 **trophozoites.** Dose response curve plotting percentage inhibition of *E. histolytica* trophozoites  
240 compared to drug concentrations of antineoplastic kinase inhibitors. The three drugs with the  
241 lowest EC<sub>50</sub> values (ibrutinib, dasatinib, and bosutinib) are plotted in red, purple, and blue. All  
242 drugs with EC<sub>50</sub> values > 2 μM are plotted in gray. Each data point represents mean values of  
243 percentage inhibition. Error bars represent standard deviation. Complete list of drugs can be  
244 found in Table 1.

245

246 **Analysis of hits**

247 In order to identify potent anti-amoebic candidates from the existing pool of AKI drugs, an  
248 approach was utilized where human protein target profiles were computationally generated for  
249 drugs active in the screen, followed by identification of additional drugs with matching or similar  
250 target profiles. To generate the target profiles for active drugs, a computational tool called  
251 CancerDrugMap (CDM) was utilized, which we have previously described, and which is  
252 available at: [ruben.ucsd.edu/dnet/](http://ruben.ucsd.edu/dnet/) (20). Using CDM, human targets of both the active and  
253 inactive compounds from the initial were compared. Protein targets were scored and ranked  
254 based on targeting activity of active compounds as well as lack of targeting activity by the  
255 inactive ones. This generated a profile of human protein targets associated with the active  
256 amoebicidal drugs in the screen (Fig 2). Based on this profile, two strategies were then  
257 employed to identify drugs with similar target profiles and hence the potential for similar anti-  
258 amoebic activity (Fig 3). In the first strategy, CDM was used to score and rank all AKI drugs in  
259 the database based on their activity against the complete ranked target profile, using an  
260 algorithm described in the methods. Drugs possessing a score greater than or equal to 15 were  
261 selected for further *in vitro* testing (Fig 4). The second strategy was identical to the first with the  
262 exception that CDM was used to score and rank drugs based on activity against target proteins  
263 individually rather than the complete profile. Drugs active above a threshold score of 15 against  
264 individual proteins from the target profile were ranked by the number of proteins from the profile  
265 they possessed this level of activity against (Table 2). Drugs possessing a score at or over the  
266 threshold of 15 against more than 2 proteins from the target profile were selected for further  
267 investigation. The first and second strategies combined generated a list of 15 drugs with similar  
268 known human protein targets to the positive hits from the initial screen, and hence high potential  
269 for corresponding anti-amoebic activity.

270

271

272 **Fig 2. Generation of human target profile for inhibitors of *E. histolytica*.** Human kinase  
273 proteins scored and ranked based on targeting activity data for active drugs versus inactive  
274 drugs from the screen. Heatmap represents the calculated activity values (pAct, see Methods)  
275 of individual drugs against individual human protein targets. Darker colors indicate stronger drug  
276 activity against the protein. Dashed line represents the cutoff pAct value for proteins to be  
277 included in the target profile for the purpose of identifying additional *E. histolytica* drug  
278 candidates.

279  
280 **Fig 3. Graphical screening workflow of antineoplastic kinase inhibitors against *E.***  
281 ***histolytica*.** Chemical structures represent the three drugs found to possess the lowest EC<sub>50</sub>  
282 values in each screen (ibrutinib, dasatinib, bosutinib, and ponatinib, neratinib, olmutinib  
283 respectively).

284  
285 **Fig 4. In silico screen based on human target profile to determine new potent**  
286 **amoebicidal drug candidates.** Antineoplastic kinase inhibitor drugs scored and ranked based  
287 on activity data regarding all 15 proteins in the amoebicidal drug target profile shown in figure 3.  
288 Score shown in the second column is calculated from the weighted sum of pAct values (see  
289 methods.) Shown are all drugs meeting the cutoff score of 15 for further screening. Heatmap  
290 displays the calculated pAct of individual drugs against individual protein targets. Darker colors  
291 indicate stronger drug activity against the protein. Purple highlight indicates drugs included in  
292 the initial *in vitro* screen. Green highlight indicates new candidate drugs.

293  
294 **Table 2. Analysis of drugs based on activity towards individual proteins in the active**  
295 **drug target profile.** Drugs are ranked based on the number of proteins from the active drug  
296 target profile towards which they possess an activity score greater than a threshold value.  
297 Darker color indicates a greater number of proteins. Drugs possessing the desired level of

298 activity towards more than two target profile proteins were considered for further screening,  
299 shown above red line.

300

| Drug name     | Number of target profile matches |
|---------------|----------------------------------|
| Dasatinib     | 15                               |
| Bosutinib     | 15                               |
| Ponatinib     | 13                               |
| Ibrutinib     | 11                               |
| Vandetanib    | 6                                |
| Cediranib     | 6                                |
| Sunitinib     | 4                                |
| Nilotinib     | 4                                |
| Masitinib     | 4                                |
| Regorafenib   | 3                                |
| Nintedanib    | 3                                |
| Neratinib     | 3                                |
| Imatinib      | 3                                |
| Brigatinib    | 3                                |
| Acalabrutinib | 3                                |
| Sorafenib     | 2                                |
| Olmutinib     | 2                                |
| Erlotinib     | 2                                |
| Crizotinib    | 2                                |
| Axitinib      | 2                                |
| Rociletinib   | 1                                |
| Osimertinib   | 1                                |
| Lapatinib     | 1                                |
| Gefitinib     | 1                                |
| Afatinib      | 1                                |

301

302

### 303 **Potential drug target proteins are present in the *E. histolytica* proteome**

304 While the data regarding activity of AKI drugs against human target proteins is valuable for the  
305 purpose of grouping drugs with the potential for similar activity against *E. histolytica*, it does not

306 provide information regarding the drugs' actual protein targets in the parasite. In order to identify  
307 whether potential drug targets exist in *E. histolytica* that are similar to the human target profile  
308 proteins, the human proteins were searched against the *E. histolytica* proteome. In order to do  
309 so, the kinase domain sequences of the human proteins were extracted and aligned against the  
310 complete published set of *E. histolytica* open reading frames (ORFs). 32 *E. histolytica* ORFs  
311 were found to align to the human sequences with a p-value of  $10^{-10}$  or less. A network map was  
312 generated of these top-scoring *E. histolytica* proteins and their relationship to the human protein  
313 targets (Fig 5). In the network map multiple *E. histolytica* ORFs can be seen to possess strong  
314 alignments to several human sequences. These results demonstrate the possibility that *E.*  
315 *histolytica* may possess protein targets equivalent to those known to be targeted in humans by  
316 the active AKI drugs.

317

318 **Fig 5. Network map of active drug profile proteins with orthologous *E. histolytica* ORFs.**

319 Orange ovals represent human sequences. Blue ovals represent *E. histolytica* sequences. Lines  
320 represent alignment relationships possessing a calculated pP greater than the cutoff value of  
321 10. Line color represents pP value, with darker lines denoting higher pP. Blue ovals shown in  
322 the center with the highest number of connecting lines represent the most likely *E. histolytica*  
323 orthologs of the human target proteins.

324

325 **Extended screen of candidate drugs based on primary analysis**

326 Based on our CDM analysis we tested the list of 12 potentially active AKI drugs against *E.*  
327 *histolytica* trophozoites in an extended *in vitro* screen. Compounds were tested as previously,  
328 using the same luciferase-based cell viability assay to determine EC<sub>50</sub> values. The drugs  
329 ponatinib, neratinib, and olmutinib were found to possess highly potent activity in this screen, all  
330 with sub-micromolar EC<sub>50</sub> values (Table 3) (Fig 6).

331  
332 **Table 3. Results of extended screen of AKI drugs against *E. histolytica* trophozoites** Color  
333 scale indicates drug potency: darker blue = more potent, lighter blue = less potent. Anti amoebic  
334 activity classified based on EC<sub>50</sub> value as: Very high (0.001 - 0.999 µM), High (1.000 - 4.999  
335 µM), Moderate (5.000 - 9.999 µM), Low (10.000 - 19.999 µM), Very low (20.000 - 99.999 µM), or  
336 None (EC<sub>50</sub> > 100.000 µM).

| Drug name     | EC <sub>50</sub> (µM) | Anti-amoebic activity |
|---------------|-----------------------|-----------------------|
| Ponatinib     | 0.1299                | Very high             |
| Neratinib     | 0.3113                | Very high             |
| Olmutinib     | 0.6462                | Very high             |
| Nintedanib    | 4.239                 | High                  |
| Cediranib     | 7.286                 | Moderate              |
| Vandetanib    | 8.971                 | Moderate              |
| Acalabrutinib | 11.34                 | Low                   |
| Masitinib     | 14.03                 | Low                   |
| Regorafenib   | 15.94                 | Low                   |
| Sorafenib     | 18.3                  | Low                   |
| Pazopanib     | >100                  | None                  |
| Axitinib      | >100                  | None                  |

337  
338  
339 **Fig 6. Extended screen of antineoplastic kinase inhibitors against *E. histolytica***  
340 **trophozoites.** Dose response curves plotting percentage inhibition of *E. histolytica* trophozoites  
341 at different drug concentrations. The three drugs with the lowest EC<sub>50</sub> values (ponatinib,  
342 neratinib, and olmutinib) are plotted in red, purple, and blue. All drugs with EC<sub>50</sub> values > 2 µM  
343 are plotted in gray. Each data point represents mean values. Error bars represent standard  
344 deviation. Complete list of drugs tested found in Table 3.

345

## 346 **Hit compounds kill *E. histolytica* trophozoites**

347 An important question regarding the activity of any compound intended to act against *E.*  
348 *histolytica* is whether it induces cell death in the parasite or merely slows its replication. In order  
349 to determine which type of activity belongs to each of the AKI drugs active in the initial and  
350 extended screens, we measured the number of surviving cells after 48 hours of drug treatment  
351 compared to freshly-counted aliquots of cells. 5,000 cells per well were seeded into 96-well  
352 plates and treated with 10 $\mu$ M of dasatinib, bosutinib, ibrutinib, ponatinib, neratinib, olmutinib,  
353 metronidazole, or vehicle. After 48 hours fresh aliquots containing a known number of cells were  
354 seeded into empty wells, CellTiter-Glo was added, and the luminescence of all wells was  
355 measured. Using the linear relationship of CellTiter-Glo luminescence to the number of cells  
356 being assayed, the number of cells in treatment group wells was calculated using their  
357 luminescence values relative to those of the freshly-aliquoted wells. All drugs tested were found  
358 to have significantly decreased the number of live cells in their treatment groups below the initial  
359 5,000 cells. In contrast, cells treated with only vehicle significantly increased in number to over  
360 14,000 cells per well (Fig 7).

361 In order to characterize whether the active drugs genuinely kill *E. histolytica*  
362 trophozoites or merely act as false positives by inhibiting the ATP-driven, luciferase-based  
363 CellTiter-Glo assay system we tested concentration ranges of each drug on cells and  
364 immediately after addition of drugs. If the drugs were acting on the CellTiter-Glo assay reagents  
365 rather than the cells themselves, a dose-response relationship of drug to assay activity should  
366 have been evident. However, no dose-response relationship was observed, and measured  
367 luminescence values remained equivalent across all concentrations of drug treatments. (S1 Fig)  
368 These results indicate that the active drugs are true positives against *E. histolytica* cells and do  
369 not inhibit the assay itself.

370



371 **Fig 7. Amoebicidal effects of antineoplastic kinase inhibitor drugs.** Live cell number  
372 calculated in comparison to aliquots of known amounts of cells. All drugs tested at 10 $\mu$ M,  
373 vehicle = 0.5% DMSO. Dotted line represents the 5000 cells originally seeded into all wells for  
374 each treatment group. Error bars represent standard deviation.

375

### 376 **Hit compounds kill *E. histolytica* trophozoites as rapidly as metronidazole**

377 In addition to drug potency, an important characteristic of any drug is the rapidity with  
378 which it achieves its desired effect. In order to characterize this aspect of the most active drugs  
379 from the trophozoite viability screens, the EC<sub>50</sub> values of ponatinib, neratinib, olmutinib, and  
380 metronidazole against *E. histolytica* trophozoites were measured at a series of timepoints after  
381 treatment initiation. The luciferase-based CellTiter-Glo cell viability assay was used as  
382 previously to determine the percent inhibition in each set of experimental replicates. Duplicate  
383 plates containing cells treated with serially-diluted ranges of ponatinib, neratinib, olmutinib, and  
384 metronidazole concentrations were prepared for each desired time point. Measurements were  
385 collected at 12, 24, 36, and 48 hours post-drug-treatment respectively. From the data obtained  
386 EC<sub>50</sub> values were calculated for each time point of each drug treatment and compared over time  
387 (Fig 8A-D). All drugs tested achieved steady EC<sub>50</sub> values within 36 hours equivalent to those  
388 observed at 48 hours (Fig 8E). These results indicate that the active AKI drugs achieve their  
389 anti-amoebic effects as rapidly as the current treatment, metronidazole.

390

391 **Fig 8. Timing of drug action against *E. histolytica* trophozoites.** (A - D) Dose-response  
392 curves measured at 12, 24, 36, and 48hr for ponatinib, neratinib, olmutinib, and metronidazole.  
393 (E) Plot of EC<sub>50</sub> values calculated from the data shown in (A-D) graphed over time. (F) Plot of *E.*  
394 *histolytica* trophozoite inhibition by AKI drugs after varying exposure times. Trophozoites were  
395 treated with ponatinib, neratinib, olmutinib, or metronidazole at 5 $\mu$ M for 2, 6, 12, 24, 36, or 48hr,

396 followed by drug washout and continued incubation until 48hr. Percent inhibition was then  
397 determined. Points represent % inhibition for each drug and exposure time scaled to the 48hr %  
398 inhibition value for the same drug. Statistical difference between groups was determined by 1-  
399 way ANOVA for each exposure time. (\*\* =  $p < 0.01$ ) (\* =  $p < 0.05$ )

400

## 401 **Hit compounds and metronidazole require similar exposure times for *E.***

### 402 ***histolytica* trophozoite inhibition**

403 To determine the amount of exposure time necessary for parasite killing by the  
404 compounds most active in the initial and extended screens, *E. histolytica* trophozoite inhibition  
405 was measured following varying treatment periods with either ponatinib, neratinib, olmutinib, or  
406 metronidazole. Cells were treated with drugs at 5  $\mu$ M for intervals ranging from 2 to 48 hours,  
407 followed by drug washout and continued incubation to 48 total hours. This concentration was  
408 chosen to ensure complete parasite killing by all drugs after 48 hours. Trophozoite viability was  
409 measured for each drug and exposure time using CellTiter-glo and the percentage inhibition  
410 was calculated. Because each drug tested possess a different anti-amoebic EC<sub>50</sub> value, the  
411 percentage inhibition for each exposure time was scaled to the 48-hour value for each  
412 respective drug. As a result, the relative effectiveness of varying exposure times could be  
413 compared across drugs irrespective of varying drug potency. All drug treatments achieved  
414 inhibition levels after 24 hours of exposure time similar to levels observed after 48 hours (Fig  
415 8F). These results indicate that ponatinib, neratinib, olmutinib, and metronidazole all require  
416 roughly 24 hours of parasite exposure time in order to achieve maximal levels of parasite  
417 inhibition. Additionally, both ponatinib and neratinib achieved significantly higher scaled %  
418 inhibition levels after 2, 6, and 12 hours compared to metronidazole, indicating that a somewhat  
419 shorter exposure time might be required for these drugs to achieve their antiparasitic effects.

420

## 421 **Antineoplastic kinase inhibitors kill mature *Entamoeba* cysts**

422 A major drawback of metronidazole as a treatment for amebiasis is its poor activity  
423 against luminal parasites and cysts (2). To determine if AKIs may be superior in this respect,  
424 we assayed for killing of mature *Entamoeba* cysts. As *E. histolytica* cannot be induced to  
425 encyst *in vitro* (23), the related parasite, *E. invadens*, a well-characterized model system for  
426 *Entamoeba* development, was utilized. Mature (72h) cysts of a transgenic line constitutively  
427 expressing luciferase were treated with 10  $\mu$ M dasatinib, bosutinib, ibrutinib, or 0.5% DMSO as  
428 negative control, for 3 days. After treatment, cysts were treated with distilled water for five  
429 hours to remove any remaining trophozoites, and luciferase activity was assayed. Ibrutinib was  
430 found to significantly reduce luciferase signal to between 10% and 50% of controls, indicating  
431 that this AKI drug is capable of killing *Entamoeba* cysts. In contrast, metronidazole up to 20  $\mu$ M  
432 had no effect (Fig 9). As ibrutinib is known to act as a covalent inhibitor of human kinase  
433 proteins, another such covalent inhibitor which showed activity in the extended screen,  
434 acalabrutinib, was also tested (24, 25). However, this drug did not consistently display any  
435 significant cysticidal activity.

436  
437 **Fig 9. Activity of antineoplastic kinase inhibitors against *Entamoeba* cysts.** Cyst survival  
438 measured using luminescence values of luciferase-expressing *E. invadens* cysts after drug  
439 treatments, compared with DMSO-treated controls. Cysticidal effect corresponds to cyst survival  
440 values below 100%. Metronidazole tested at 20 $\mu$ M. All other drugs tested at 10 $\mu$ M. Data points  
441 represent biological replicates. Asterisk indicates ( $p < 0.05$ ).

442

## 443 **Discussion**

444 Treatment options for amoebiasis are currently limited to either nitroimidazole drugs  
445 such as metronidazole, which acts via anaerobic activation to toxic reactive forms in *E.*

446 *histolytica* (10). While other drugs have been proposed or used at times, a 2013 systematic  
447 review concluded that only nitroimidazole drugs and the thiazolide drug nitazoxanide are likely  
448 to be beneficial to patients (10). This fact, when coupled with emerging drug resistance to  
449 metronidazole as well as its lack of activity against the infectious cyst form of *E. histolytica*  
450 necessitates the search for new treatment options (13).

451 In this study we tested the hypothesis that *E. histolytica* could be killed by FDA-approved  
452 antineoplastic kinase inhibitors, possibly via action on parasitic homologs of human kinases. Out  
453 of 24 such drugs tested, six were shown to possess strong anti-amoebic properties,  
454 representing a completely new class of drugs in this area. All of the six highly active drugs  
455 displayed unique and important advantages over the current treatment. Dasatinib, ibrutinib,  
456 bosutinib, ponatinib, neratinib, and olmutinib were all for the first time shown to kill *E. histolytica*  
457 trophozoites *in vitro* significantly more potently than metronidazole. Ponatinib, neratinib, and  
458 olmutinib in particular demonstrated sub-micromolar EC<sub>50</sub> values rarely observed for any  
459 compound against this organism. These latter three were also shown to act as rapidly as  
460 metronidazole, and two of them, ponatinib and neratinib, were shown to act after shorter  
461 exposure times. Significantly, ibrutinib was also shown to kill the cysts of the related model  
462 organism *E. invadens* in contrast to metronidazole which was not. This feature is particularly  
463 unique and desirable for epidemiological purposes. Outside of the current study, both ibrutinib  
464 and neratinib have been shown to possess good brain penetrance, as does metronidazole (26-  
465 28). Taken together all these properties give the six drugs strong potential for repurposing  
466 against *E. histolytica* infection, especially in advanced amoebiasis cases where infection has  
467 progressed to the liver or brain, or in cases of cancer patients with *E. histolytica* infections (3, 8,  
468 29).

469 Interestingly, a recent high-throughput screen of the reframedDB commercial drug library  
470 also observed activity of ponatinib and dasatinib against *E. histolytica*, as well as the tyrosine  
471 kinase inhibitor rebastinib not included in the current study. While this screen is currently

472 unpublished, the results can be viewed at (<https://reframedb.org/assays/A00203>). The  
473 researchers involved in this screen have also conducted screens of the same library against the  
474 parasitic amoebae *Naegleria fowleri* and *Balamuthia mandrillaris*, both of which found ponatinib  
475 to be active (30). All of these results further validate the potential for AKIs as a new class of  
476 highly potent drugs against *E. histolytica*, and potentially other parasitic amoeba as well.

477 One drawback to AKIs which might limit their use as hypothetical clinical antiparasitic  
478 drugs is their ability to cause moderate-to-severe adverse effects in humans. All of the drugs  
479 found to be highly active in this study are known to possess this downside (31-40). In particular,  
480 AKIs tend to cause diarrhea as one of the most common adverse effects and as such have the  
481 potential to exacerbate the symptoms of a diarrheal disease such as amoebiasis (37-39). It is  
482 worth noting however, that this feature is shared in common with the current standard of care for  
483 amoebiasis, metronidazole (7). As such it may not necessarily disqualify AKIs from use against  
484 this disease, especially as it has been found to be easily manageable in clinical trials with  
485 standard anti-diarrheal therapy (38). Another strategy to circumvent the adverse effects  
486 associated with these AKIs could involve the testing of structurally related molecules for activity  
487 against amoebae without activity against human kinases.  
488 Taken together the results of this study document a new class of FDA-approved drugs with  
489 strong potential for repurposing against a widespread and devastating pathogen. Future  
490 research may expand on these findings by characterizing the molecular mechanisms underlying  
491 the actions of these drugs as well as testing their *in vivo* efficacy.

492

## 493 **Acknowledgments**

494 The authors of this study would like to thank Dr. Jim McKerrow and the Center for  
495 Discovery and Innovation in Parasitic Diseases at the Skaggs School of Pharmacy at the

496 University of California - San Diego as well as Lily Hahn, Thi Nguyen, and Abdolhakim  
497 Mohammed for their contributions to this work.

498

## 499 **References**

- 500 1. Shirley DT, Farr L, Watanabe K, Moonah S. A Review of the Global Burden, New  
501 Diagnostics, and Current Therapeutics for Amebiasis. *Open forum infectious diseases*.  
502 2018;5(7):ofy161.
- 503 2. Pritt BS, Clark CG. Amebiasis. *Mayo Clin Proc*. 2008;83(10):1154-9; quiz 9-60.
- 504 3. Ralston KS, Petri WA, Jr. Tissue destruction and invasion by *Entamoeba histolytica*.  
505 *Trends in parasitology*. 2011;27(6):254-63.
- 506 4. Faria CP, Zanini GM, Dias GS, da Silva S, de Freitas MB, Almendra R, et al. Geospatial  
507 distribution of intestinal parasitic infections in Rio de Janeiro (Brazil) and its association with  
508 social determinants. *PLoS Negl Trop Dis*. 2017;11(3):e0005445.
- 509 5. Sahimin N, Lim YA, Ariffin F, Behnke JM, Lewis JW, Mohd Zain SN. Migrant Workers in  
510 Malaysia: Current Implications of Sociodemographic and Environmental Characteristics in the  
511 Transmission of Intestinal Parasitic Infections. *PLoS Negl Trop Dis*. 2016;10(11):e0005110.
- 512 6. Verkerke HP, Petri WA, Jr., Marie CS. The dynamic interdependence of amebiasis,  
513 innate immunity, and undernutrition. *Semin Immunopathol*. 2012;34(6):771-85.
- 514 7. Dusengeyezu E, Kadima J. How do Metronidazole Drawbacks Impact Patient  
515 Compliance and Therapeutic Outcomes in Treating Amoebiasis in Rwanda. *International*  
516 *Journal of TROPICAL DISEASE & Health*. 2016;17(3):1-7.
- 517 8. Carrero JC, Reyes-Lopez M, Serrano-Luna J, Shibayama M, Unzueta J, Leon-Sicairos  
518 N, et al. Intestinal amoebiasis: 160 years of its first detection and still remains as a health  
519 problem in developing countries. *Int J Med Microbiol*. 2020;310(1):151358.

- 520 9. Garduno-Espinosa J, Martinez-Garcia MC, Fajardo-Gutierrez A, Ortega-Alvarez M,  
521 Alvarez-Espinosa A, Vega-Perez V, et al. Frequency and risk factors associated with  
522 metronidazole therapeutic noncompliance. *Revista de investigacion clinica; organo del Hospital*  
523 *de Enfermedades de la Nutricion*. 1992;44(2):235-40.
- 524 10. Marie C, Petri WA, Jr. Amoebic dysentery. *BMJ clinical evidence*. 2013;2013.
- 525 11. Kikuchi T, Koga M, Shimizu S, Miura T, Maruyama H, Kimura M. Efficacy and safety of  
526 paromomycin for treating amebiasis in Japan. *Parasitology international*. 2013;62(6):497-501.
- 527 12. Blessmann J, Tannich E. Treatment of asymptomatic intestinal *Entamoeba histolytica*  
528 infection. *The New England journal of medicine*. 2002;347(17):1384.
- 529 13. Wassmann C, Hellberg A, Tannich E, Bruchhaus I. Metronidazole resistance in the  
530 protozoan parasite *Entamoeba histolytica* is associated with increased expression of iron-  
531 containing superoxide dismutase and peroxiredoxin and decreased expression of ferredoxin 1  
532 and flavin reductase. *The Journal of biological chemistry*. 1999;274(37):26051-6.
- 533 14. Debnath A, Parsonage D, Andrade RM, He C, Cobo ER, Hirata K, et al. A high-  
534 throughput drug screen for *Entamoeba histolytica* identifies a new lead and target. *Nat Med*.  
535 2012;18(6):956-60.
- 536 15. Bashyal B, Li L, Bains T, Debnath A, LaBarbera DV. *Larrea tridentata*: A novel source  
537 for anti-parasitic agents active against *Entamoeba histolytica*, *Giardia lamblia* and *Naegleria*  
538 *fowleri*. *PLoS Negl Trop Dis*. 2017;11(8):e0005832.
- 539 16. Ehrenkaufer GM, Suresh S, Solow-Cordero D, Singh U. High-Throughput Screening of  
540 *Entamoeba* Identifies Compounds Which Target Both Life Cycle Stages and Which Are  
541 Effective Against Metronidazole Resistant Parasites. *Front Cell Infect Microbiol*. 2018;8:276.
- 542 17. Mi-Ichi F, Ishikawa T, Tam VK, Deloer S, Hamano S, Hamada T, et al. Characterization  
543 of *Entamoeba histolytica* adenosine 5'-phosphosulfate (APS) kinase; validation as a target and  
544 provision of leads for the development of new drugs against amoebiasis. *PLoS Negl Trop Dis*.  
545 2019;13(8):e0007633.

- 546 18. Nurkanto A, Jeelani G, Yamamoto T, Naito Y, Hishiki T, Mori M, et al. Characterization  
547 and validation of *Entamoeba histolytica* pantothenate kinase as a novel anti-amebic drug target.  
548 *Int J Parasitol Drugs Drug Resist.* 2018;8(1):125-36.
- 549 19. Anamika K, Bhattacharya A, Srinivasan N. Analysis of the protein kinome of *Entamoeba*  
550 *histolytica*. *Proteins.* 2008;71(2):995-1006.
- 551 20. Shi D, Khan F, Abagyan R. Extended Multitarget Pharmacology of Anticancer Drugs. *J*  
552 *Chem Inf Model.* 2019;59(6):3006-17.
- 553 21. Abagyan RA, Batalov S. Do aligned sequences share the same fold? *Journal of*  
554 *molecular biology.* 1997;273(1):355-68.
- 555 22. Ehrenkaufer GM, Singh U. Transient and stable transfection in the protozoan parasite  
556 *Entamoeba invadens*. *Mol Biochem Parasitol.* 2012;184(1):59-62.
- 557 23. Sanchez L, Enea V, Eichinger D. Identification of a developmentally regulated transcript  
558 expressed during encystation of *Entamoeba invadens*. *Mol Biochem Parasitol.* 1994;67(1):125-  
559 35.
- 560 24. Barf T, Covey T, Izumi R, van de Kar B, Gulrajani M, van Lith B, et al. Acalabrutinib  
561 (ACP-196): A Covalent Bruton Tyrosine Kinase Inhibitor with a Differentiated Selectivity and In  
562 Vivo Potency Profile. *J Pharmacol Exp Ther.* 2017;363(2):240-52.
- 563 25. Davids MS, Brown JR. Ibrutinib: a first in class covalent inhibitor of Bruton's tyrosine  
564 kinase. *Future Oncol.* 2014;10(6):957-67.
- 565 26. Bradley CA. Brain metastases respond to neratinib plus capecitabine. *Nature reviews*  
566 *Clinical oncology.* 2019;16(6):336.
- 567 27. Goldwirt L, Beccaria K, Ple A, Sauvageon H, Mourah S. Ibrutinib brain distribution: a  
568 preclinical study. *Cancer chemotherapy and pharmacology.* 2018;81(4):783-9.
- 569 28. Duchnowska R, Loibl S, Jassem J. Tyrosine kinase inhibitors for brain metastases in  
570 HER2-positive breast cancer. *Cancer treatment reviews.* 2018;67:71-7.



- 571 29. Petri WA, Haque R. Entamoeba histolytica brain abscess. Handbook of clinical  
572 neurology. 2013;114:147-52.
- 573 30. Kangussu-Marcolino MM, Ehrenkaufner GM, Chen E, Debnath A, Singh U. Identification  
574 of plicamycin, TG02, panobinostat, lestaurtinib, and GDC-0084 as promising compounds for the  
575 treatment of central nervous system infections caused by the free-living amebae Naegleria,  
576 Acanthamoeba and Balamuthia. Int J Parasitol Drugs Drug Resist. 2019;11:80-94.
- 577 31. Kantarjian HM, Cortes JE, Kim DW, Khoury HJ, Brummendorf TH, Porkka K, et al.  
578 Bosutinib safety and management of toxicity in leukemia patients with resistance or intolerance  
579 to imatinib and other tyrosine kinase inhibitors. Blood. 2014;123(9):1309-18.
- 580 32. Kaur V, Swami A. Ibrutinib in CLL: a focus on adverse events, resistance, and novel  
581 approaches beyond ibrutinib. Ann Hematol. 2017;96(7):1175-84.
- 582 33. Dorer DJ, Knickerbocker RK, Baccarani M, Cortes JE, Hochhaus A, Talpaz M, et al.  
583 Impact of dose intensity of ponatinib on selected adverse events: Multivariate analyses from a  
584 pooled population of clinical trial patients. Leuk Res. 2016;48:84-91.
- 585 34. Ottmann O, Saglio G, Apperley JF, Arthur C, Bullorsky E, Charbonnier A, et al. Long-  
586 term efficacy and safety of dasatinib in patients with chronic myeloid leukemia in accelerated  
587 phase who are resistant to or intolerant of imatinib. Blood cancer journal. 2018;8(9):88.
- 588 35. Caldemeyer L, Dugan M, Edwards J, Akard L. Long-Term Side Effects of Tyrosine  
589 Kinase Inhibitors in Chronic Myeloid Leukemia. Curr Hematol Malig Rep. 2016;11(2):71-9.
- 590 36. Heiblig M, Rea D, Chretien ML, Charbonnier A, Rousselot P, Coiteux V, et al. Ponatinib  
591 evaluation and safety in real-life chronic myelogenous leukemia patients failing more than two  
592 tyrosine kinase inhibitors: the PEARL observational study. Exp Hematol. 2018;67:41-8.
- 593 37. Tao Z, Li SX, Shen K, Zhao Y, Zeng H, Ma X. Safety and Efficacy Profile of Neratinib: A  
594 Systematic Review and Meta-Analysis of 23 Prospective Clinical Trials. Clin Drug Investig.  
595 2019;39(1):27-43.

- 596 38. Paydas S. Management of adverse effects/toxicity of ibrutinib. Crit Rev Oncol Hematol.  
597 2019;136:56-63.
- 598 39. Irvine E, Williams C. Treatment-, patient-, and disease-related factors and the  
599 emergence of adverse events with tyrosine kinase inhibitors for the treatment of chronic myeloid  
600 leukemia. Pharmacotherapy. 2013;33(8):868-81.
- 601 40. Liao BC, Lin CC, Lee JH, Yang JC. Update on recent preclinical and clinical studies of  
602 T790M mutant-specific irreversible epidermal growth factor receptor tyrosine kinase inhibitors.  
603 Journal of biomedical science. 2016;23(1):86.

604

605

606 **S1 Fig. False-positive assay against *E. histolytica* trophozoites.** All drugs were tested at a  
607 serially-diluted range of concentrations. Cell viability measured at T = 0.

608

609 **S2 Dataset. Fig 1 Data.**

610

611 **S3 Dataset. Fig 6 Data.**

612

613 **S4 Dataset. Fig 7 Data.**

614

615 **S5 Dataset. Fig 8 Data.**

616

617 **S6 Dataset. Fig 9 Data.**

618

619 **S7 Dataset. S1 Fig Data.**

620

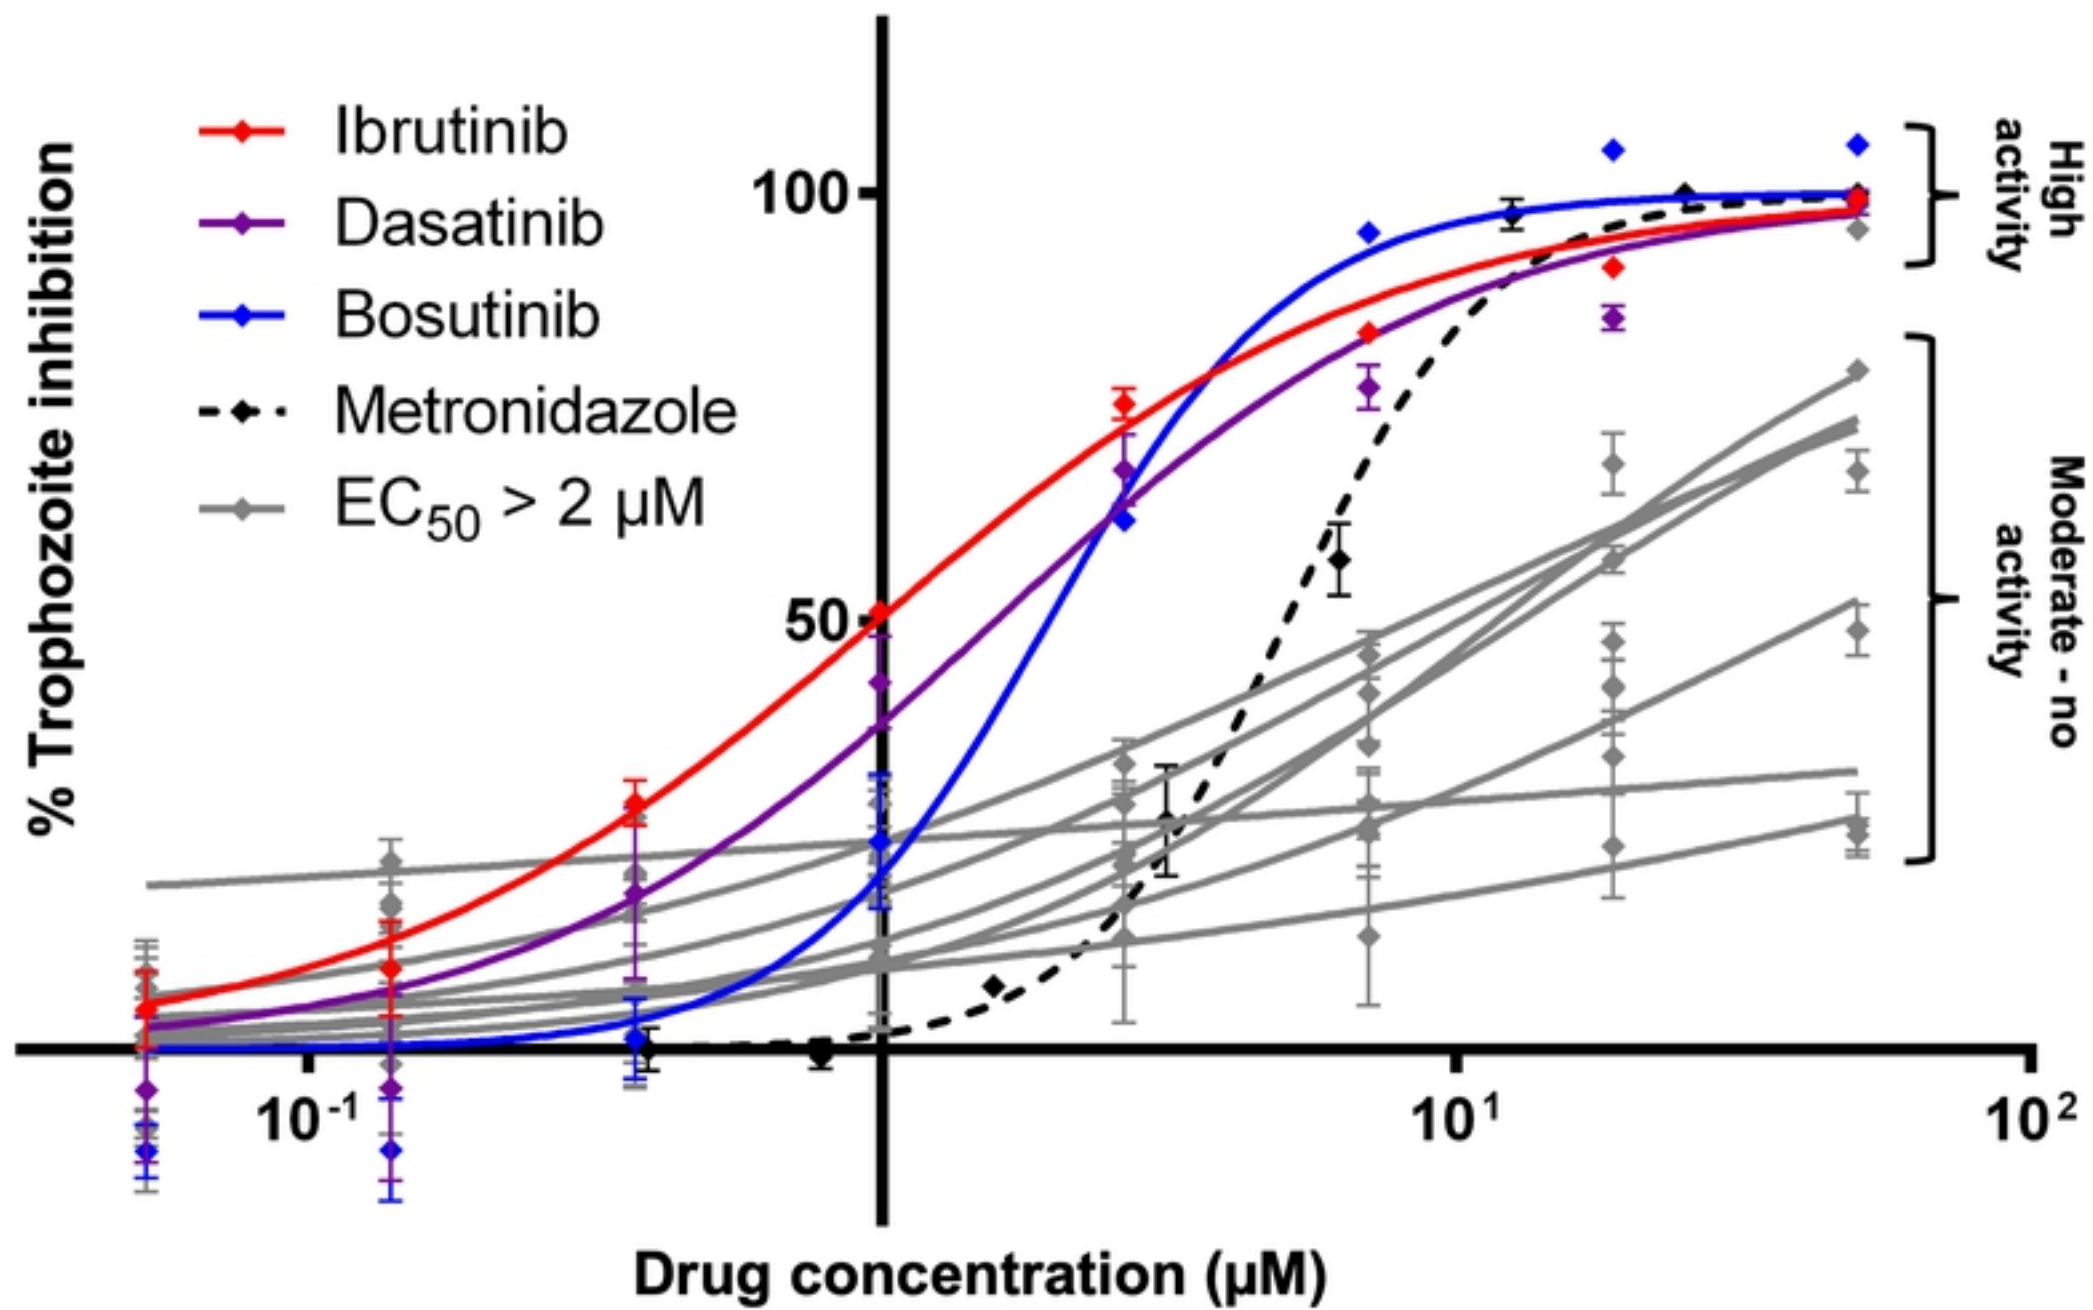

Fig 1

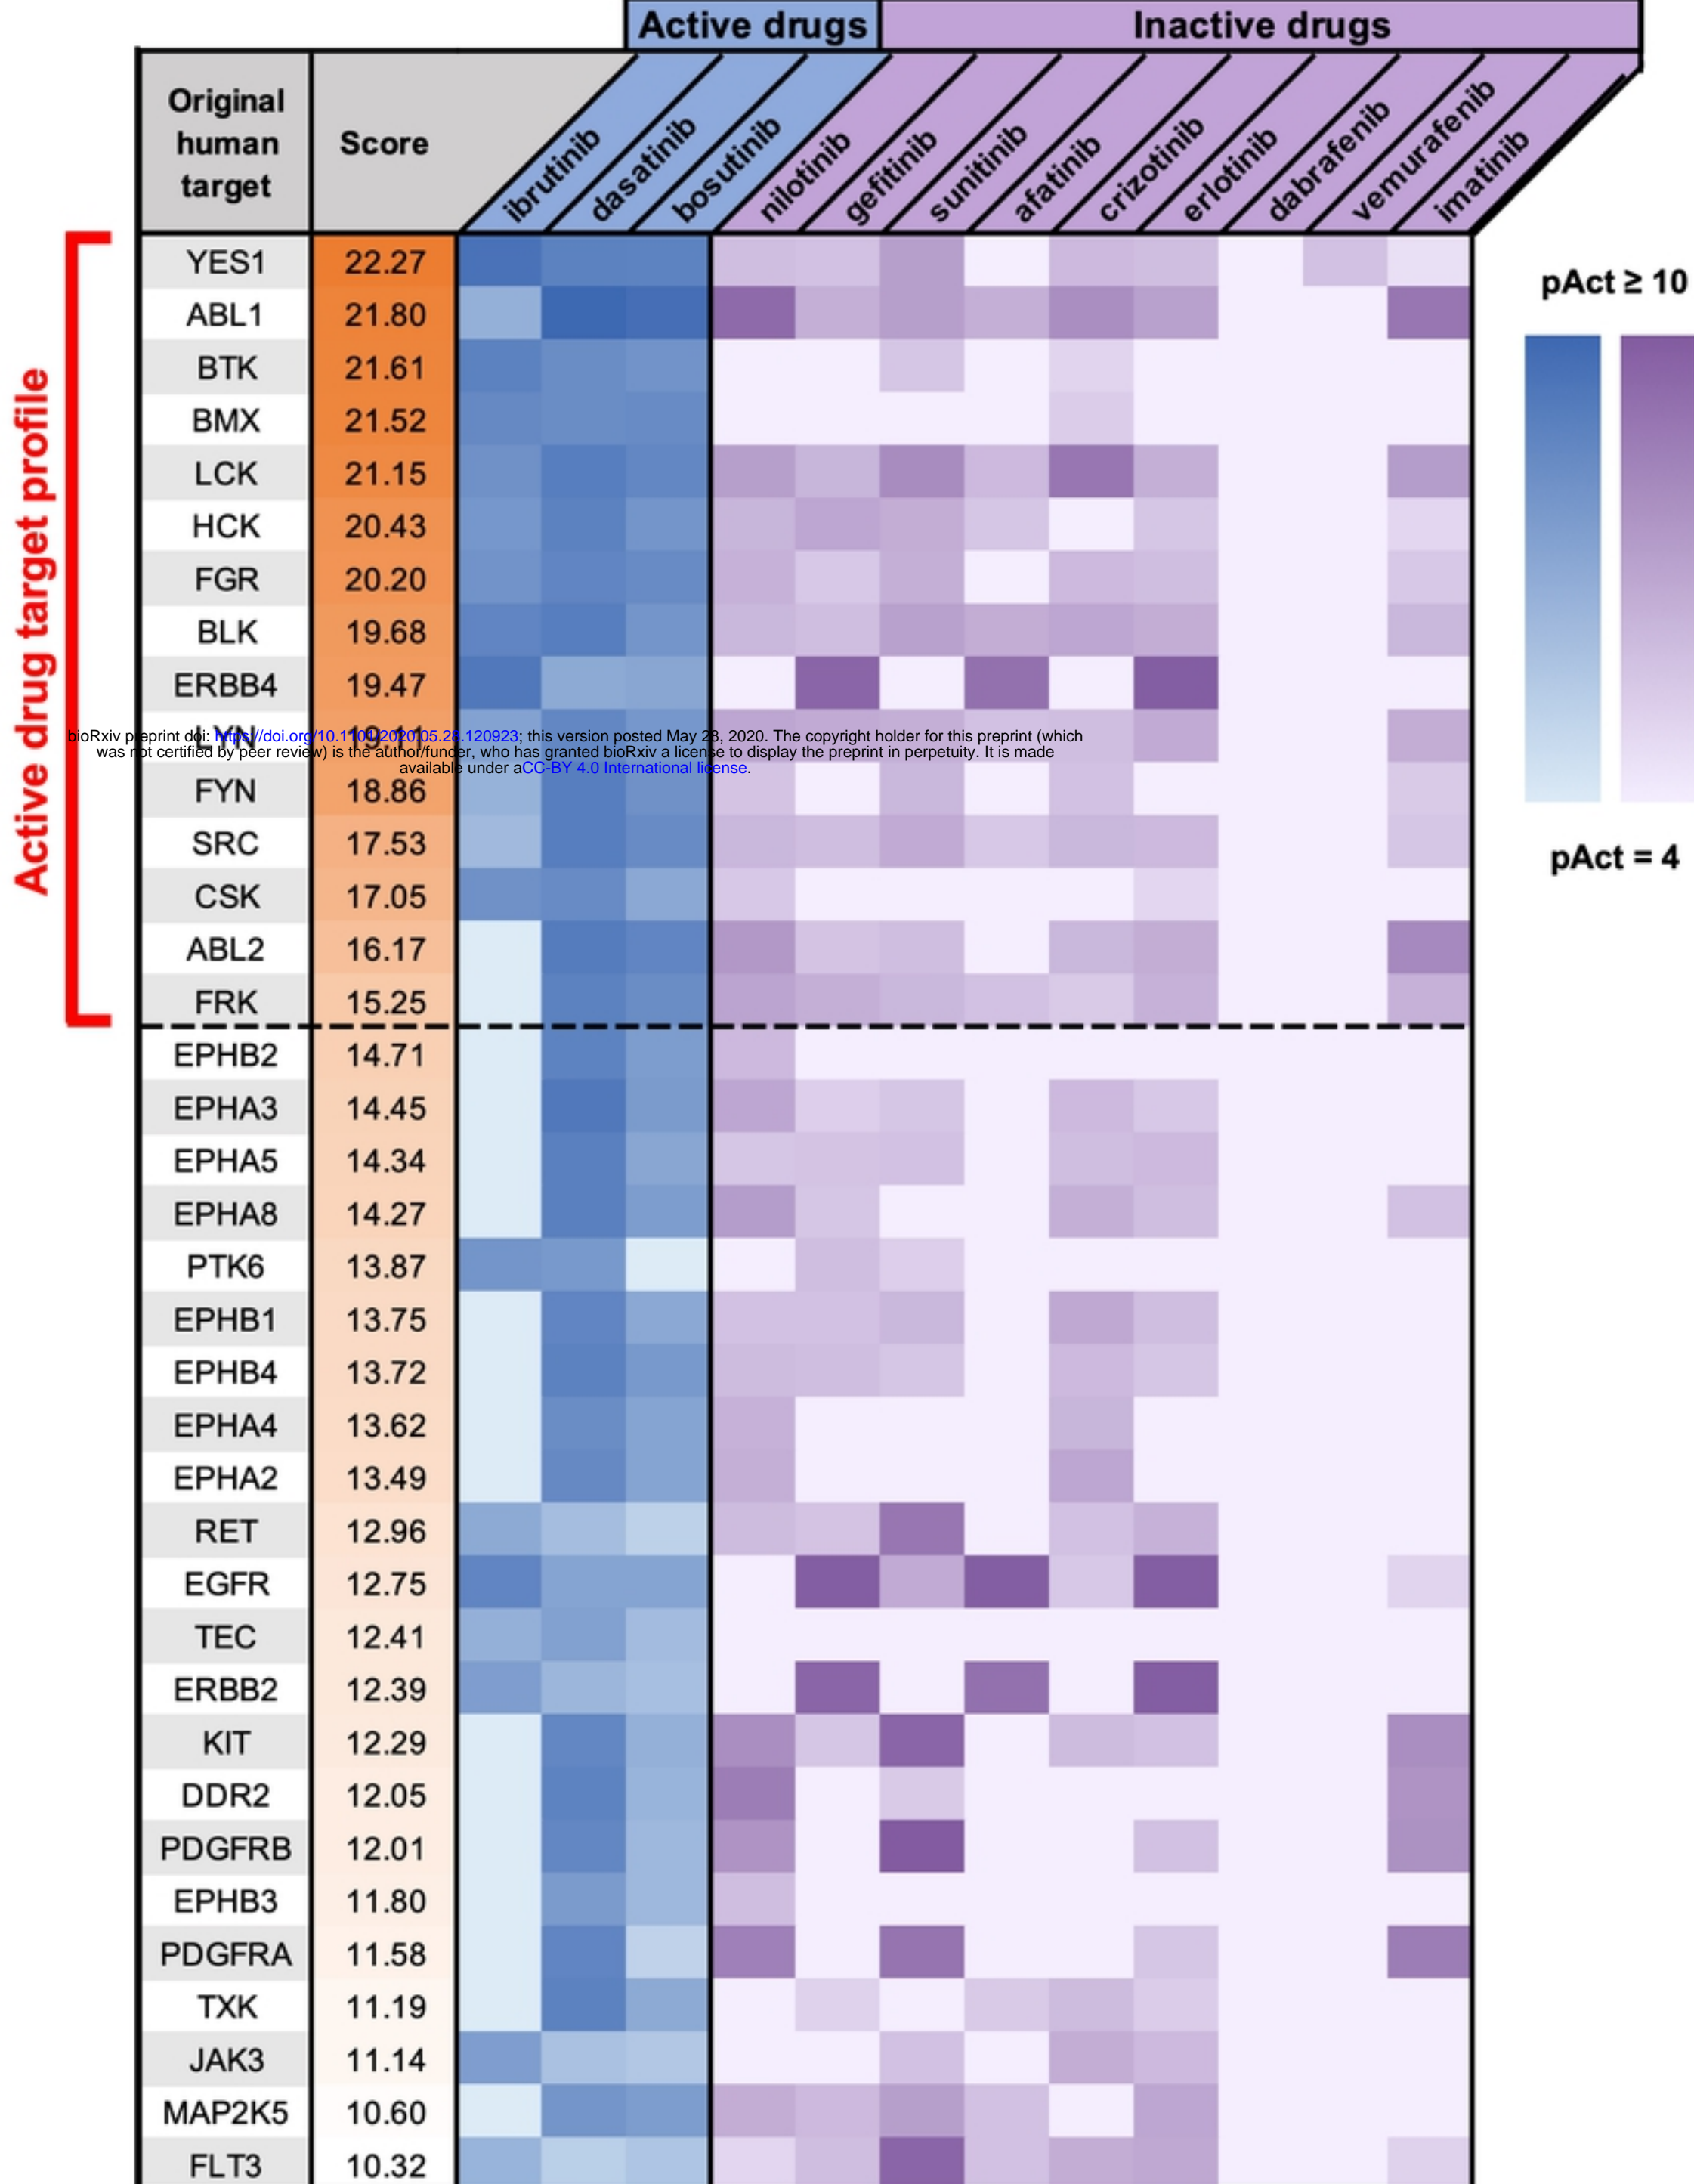

Fig 2



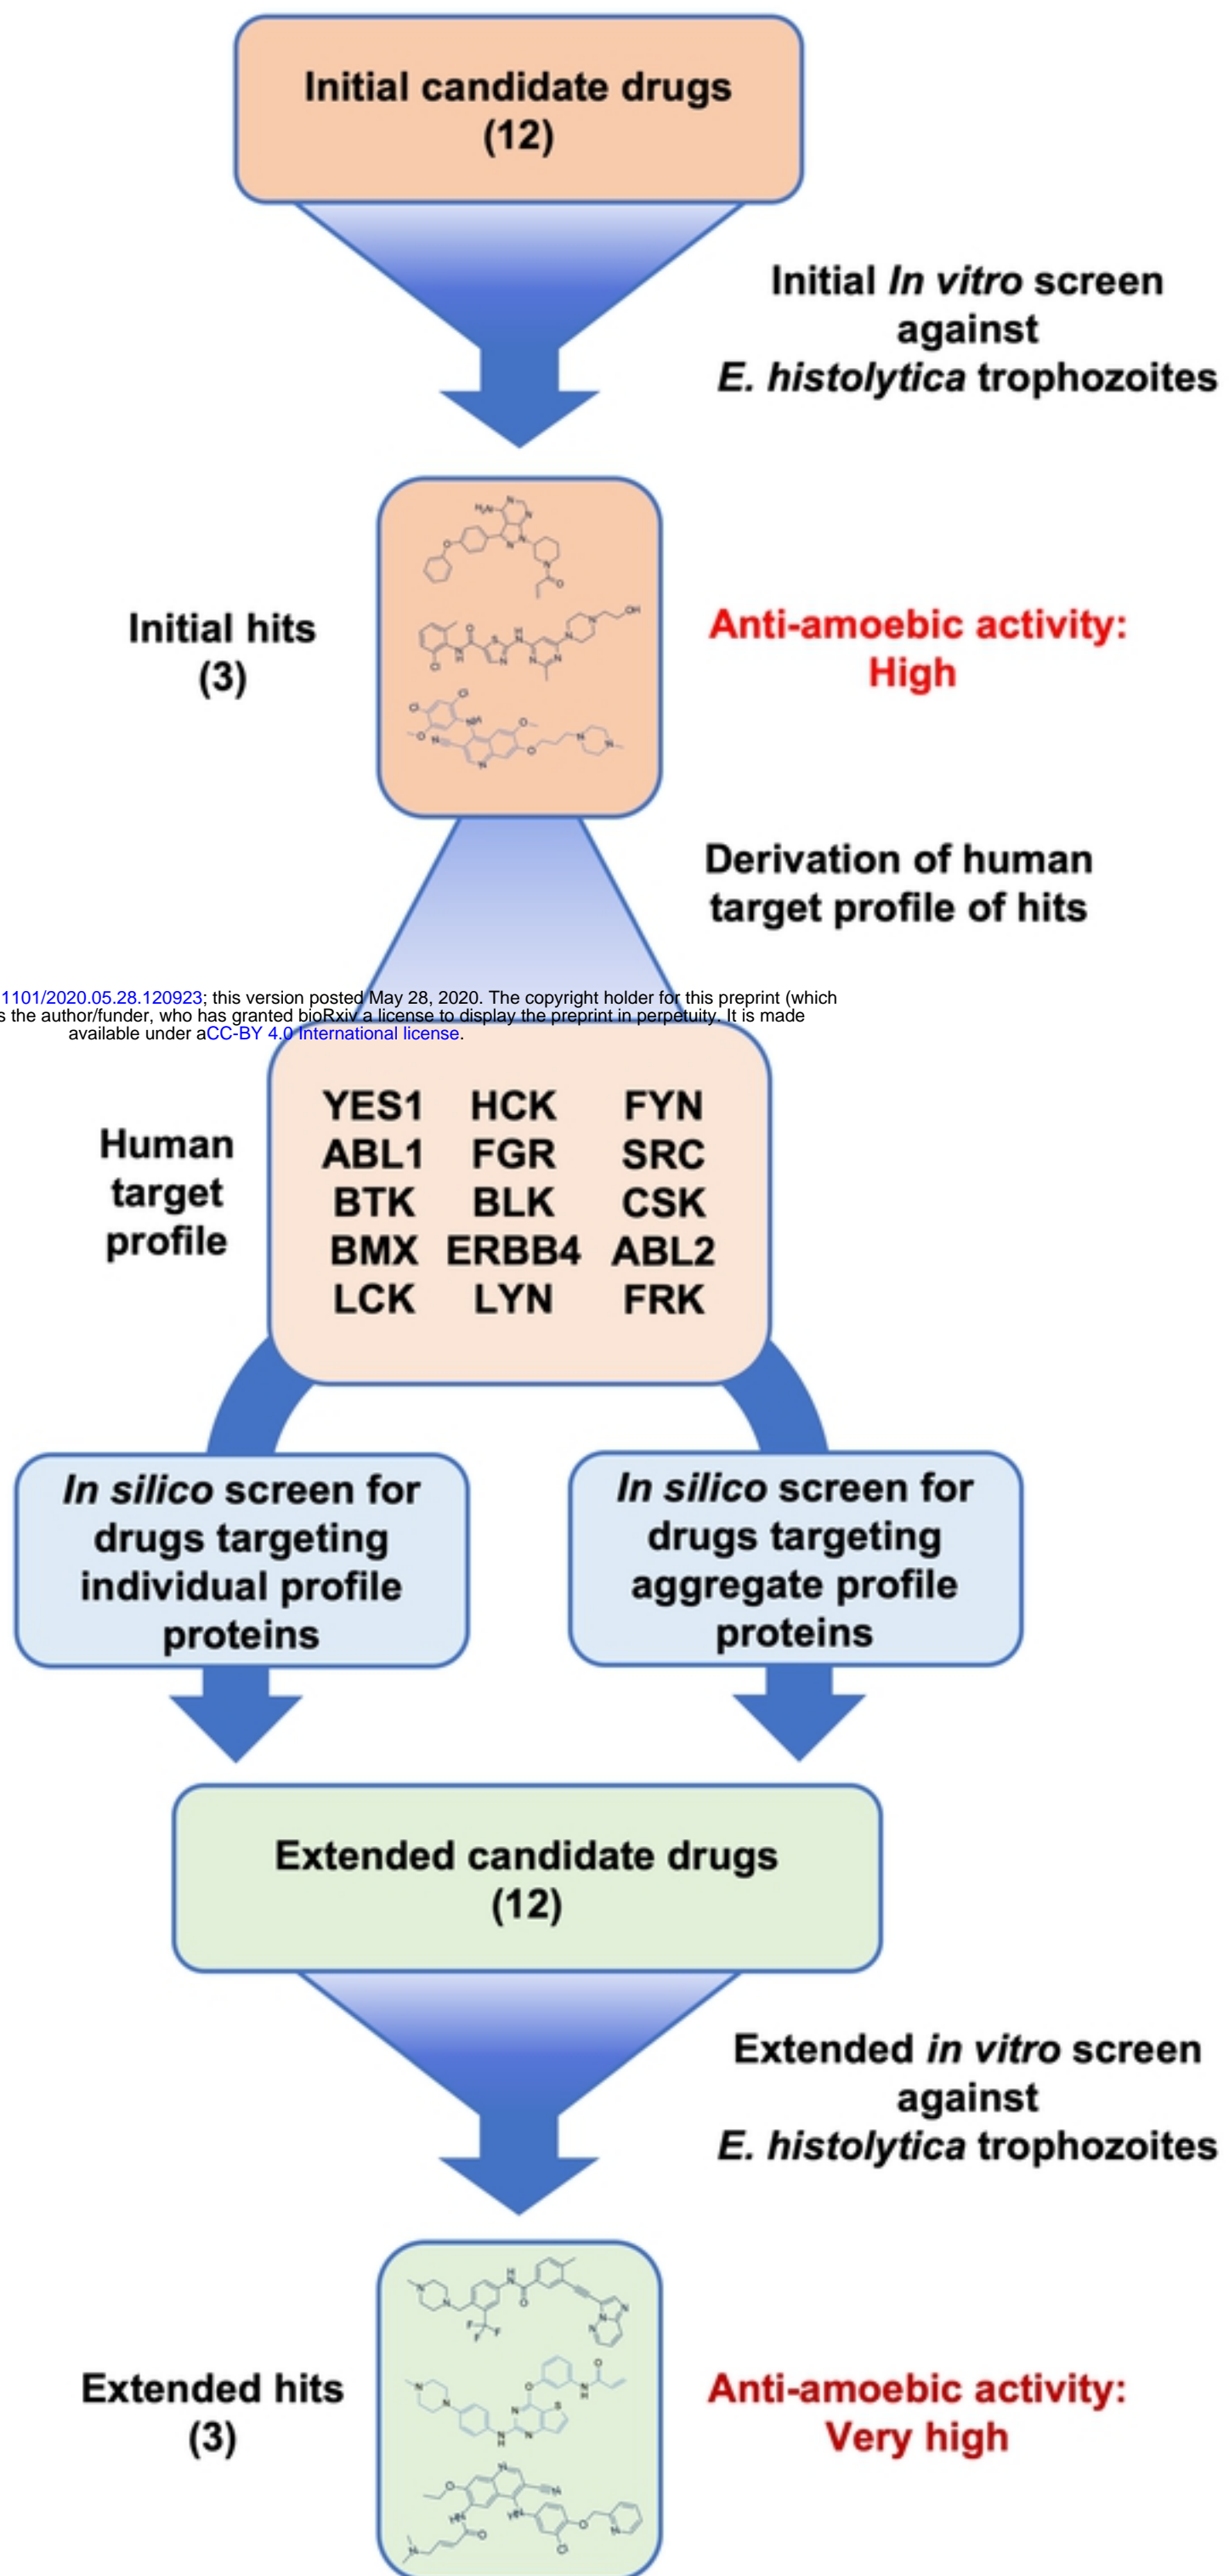

bioRxiv preprint doi: <https://doi.org/10.1101/2020.05.28.120923>; this version posted May 28, 2020. The copyright holder for this preprint (which was not certified by peer review) is the author/funder, who has granted bioRxiv a license to display the preprint in perpetuity. It is made available under aCC-BY 4.0 International license.

Fig 3

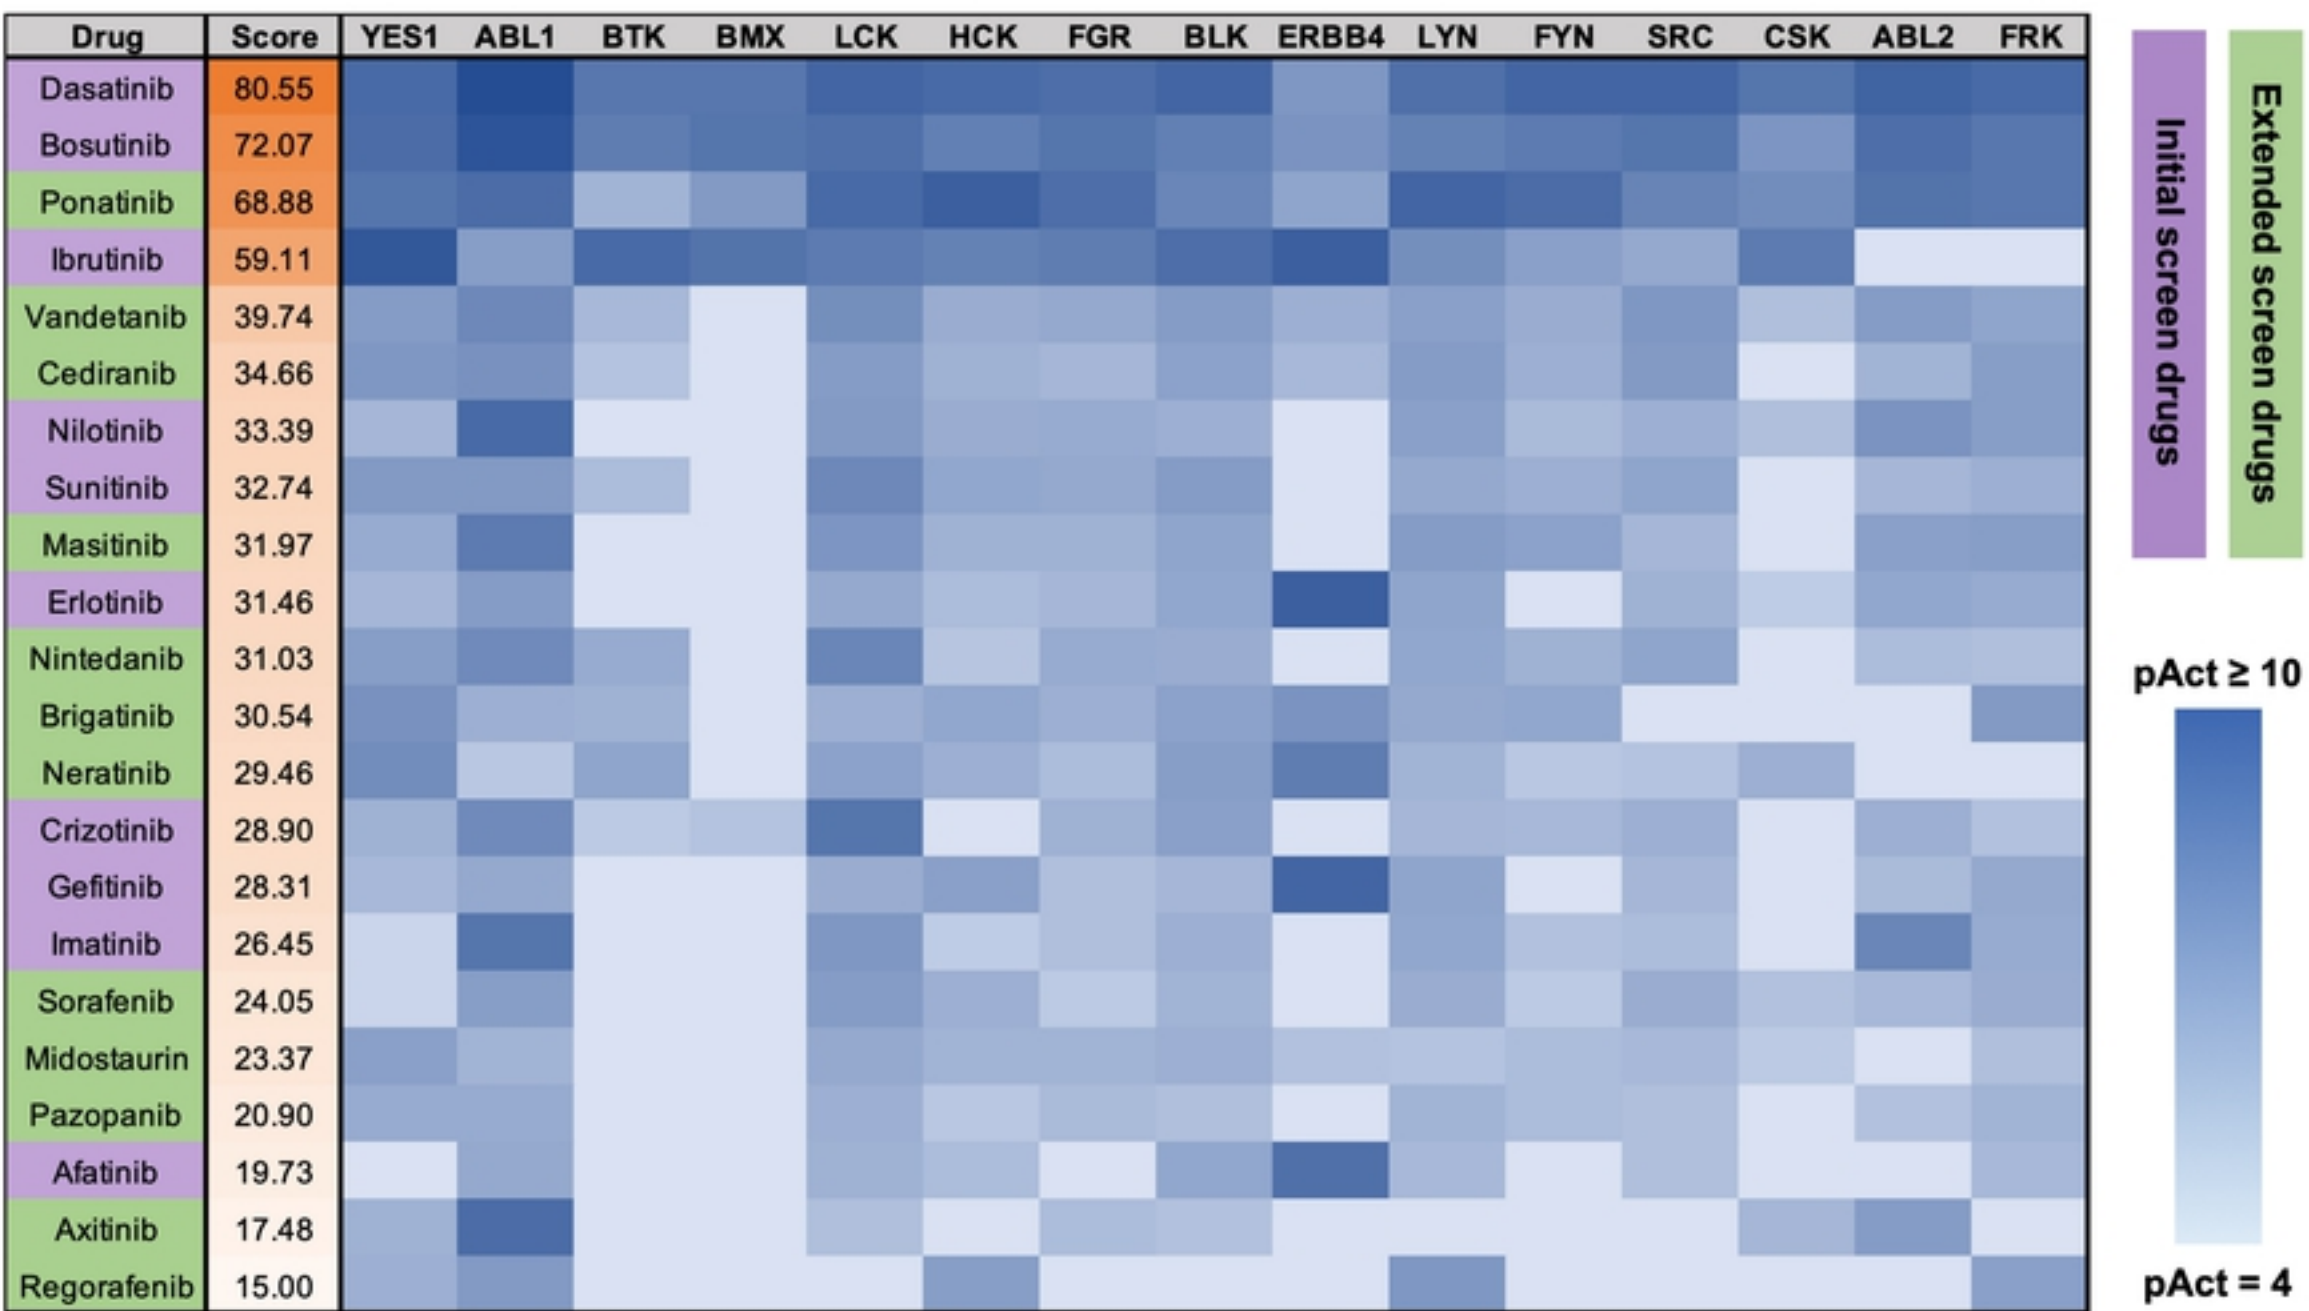

Fig 4



bioRxiv preprint doi: <https://doi.org/10.1101/2020.05.28.120923>; this version posted May 28, 2020. The copyright holder for this preprint (which was not certified by peer review) is the author/funder, who has granted bioRxiv a license to display the preprint in perpetuity. It is made available under aCC-BY 4.0 International license.

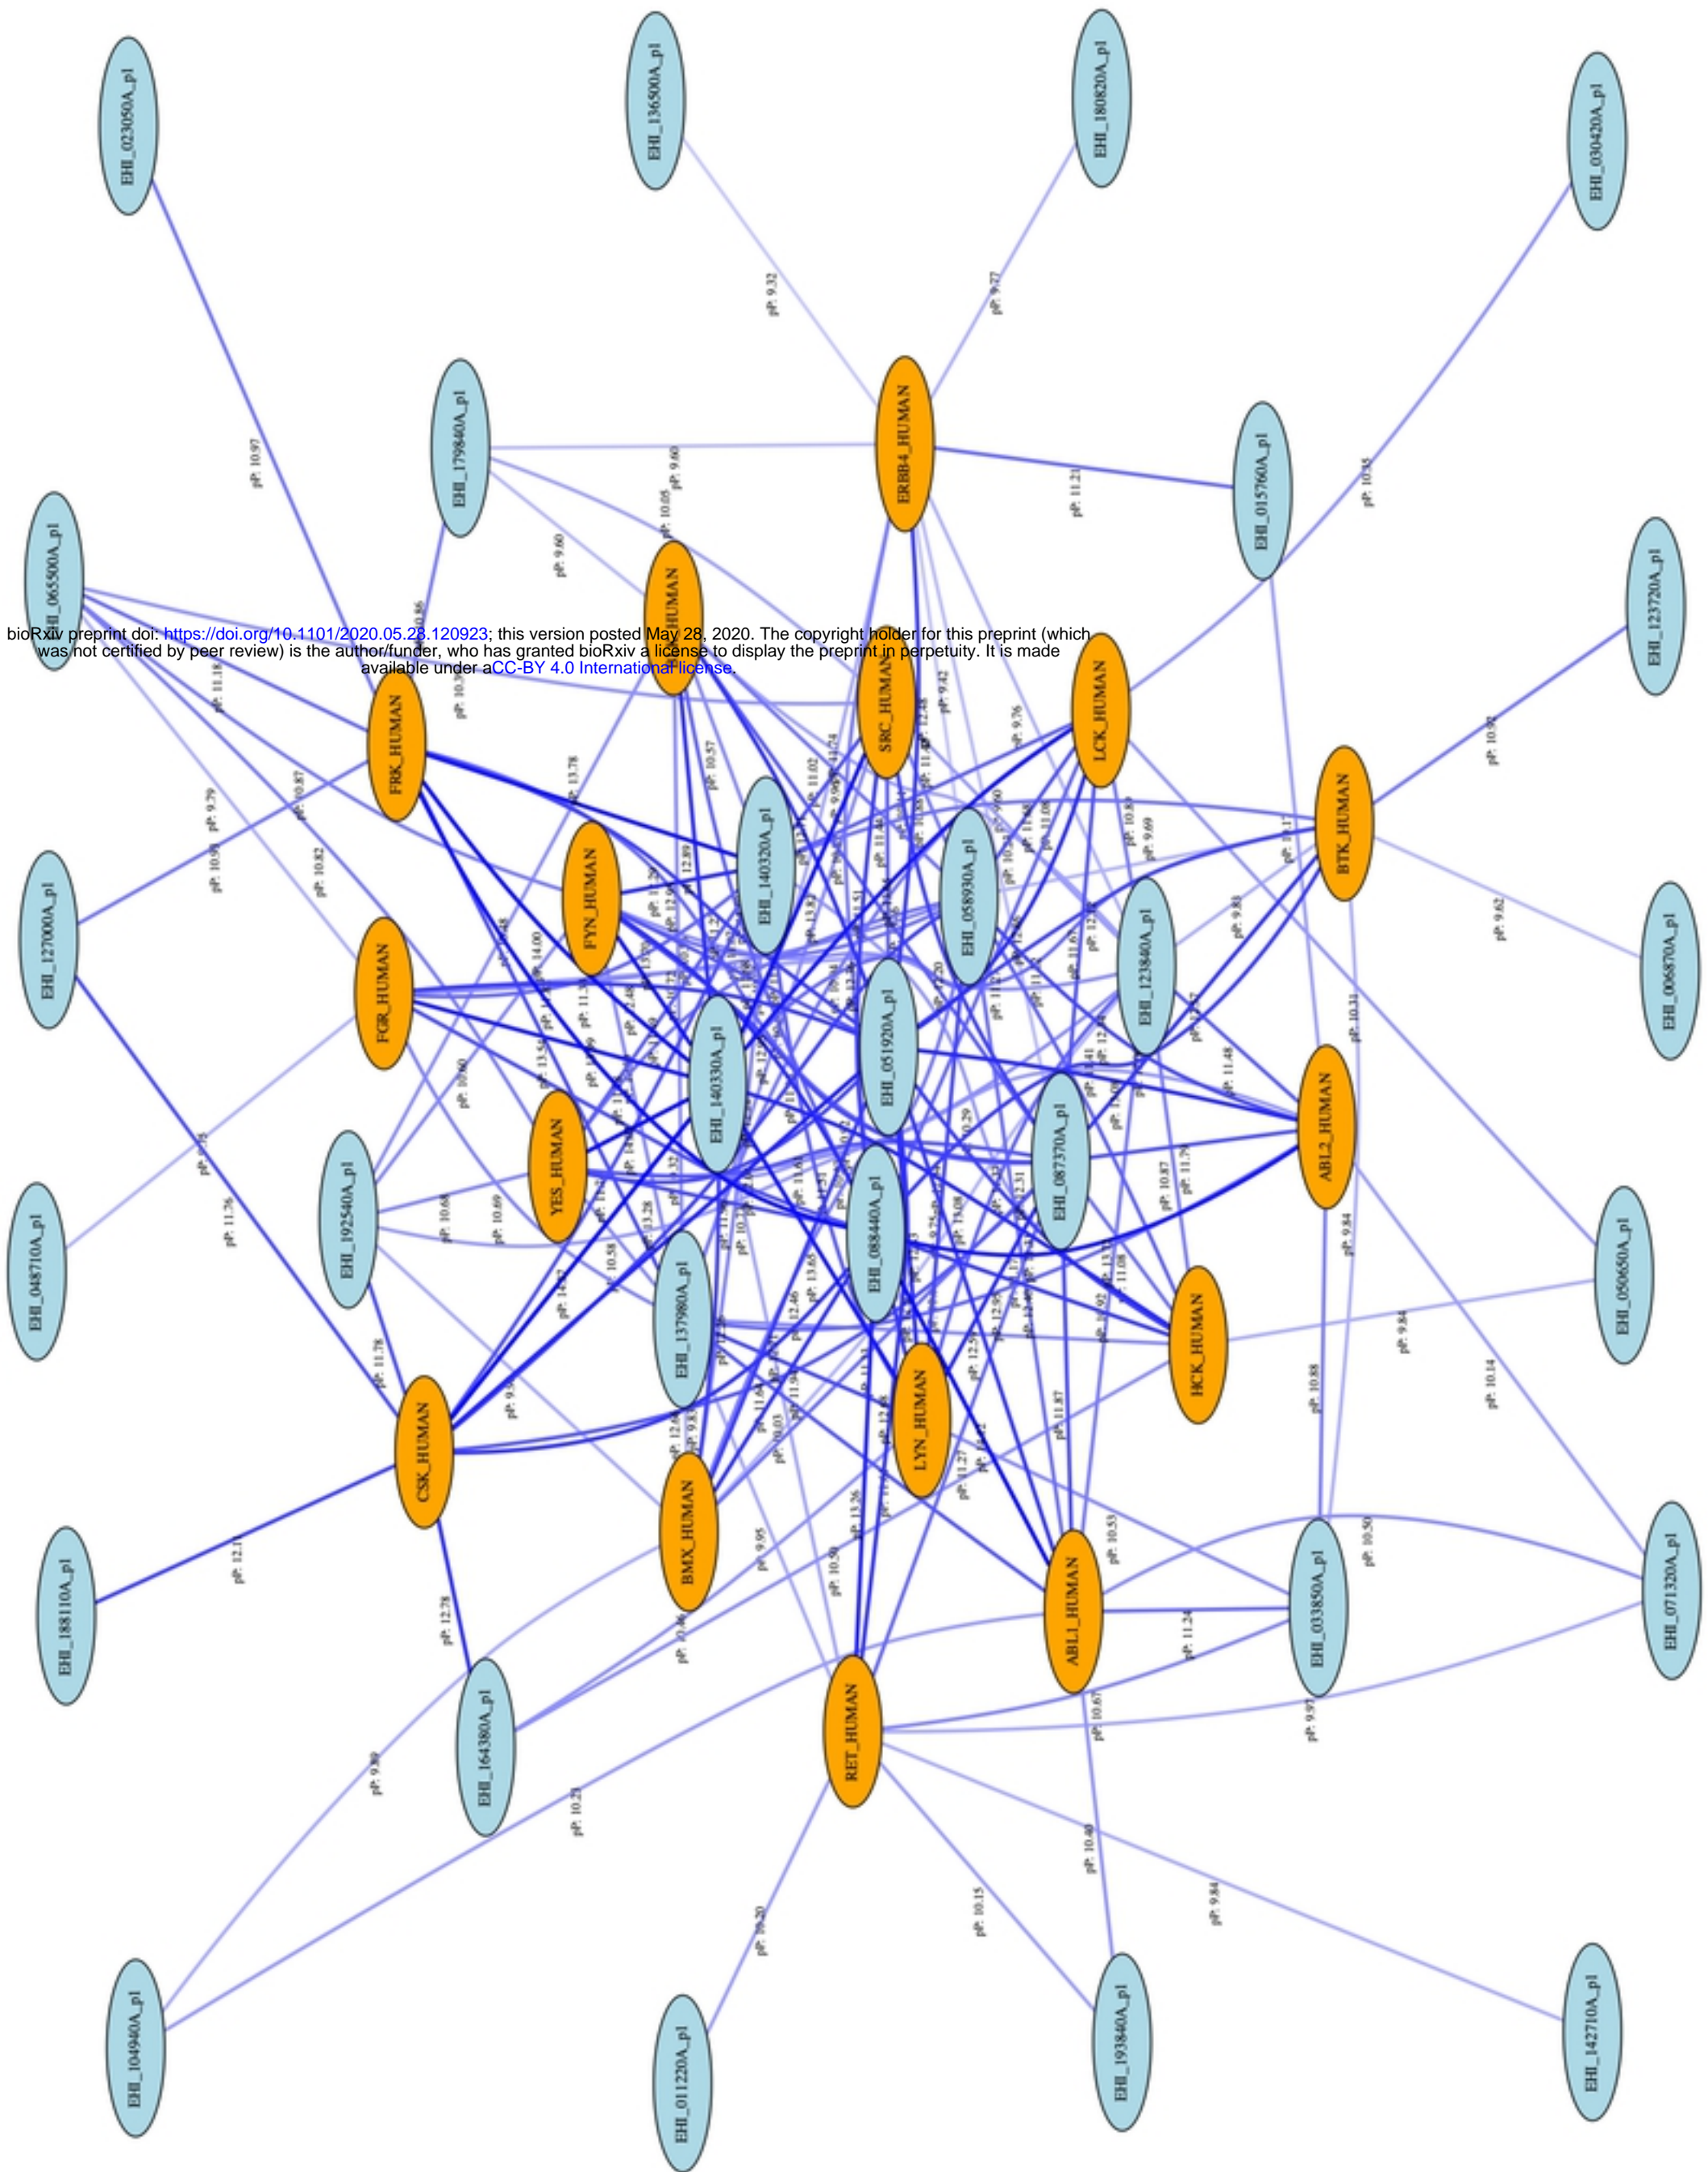

Fig 5

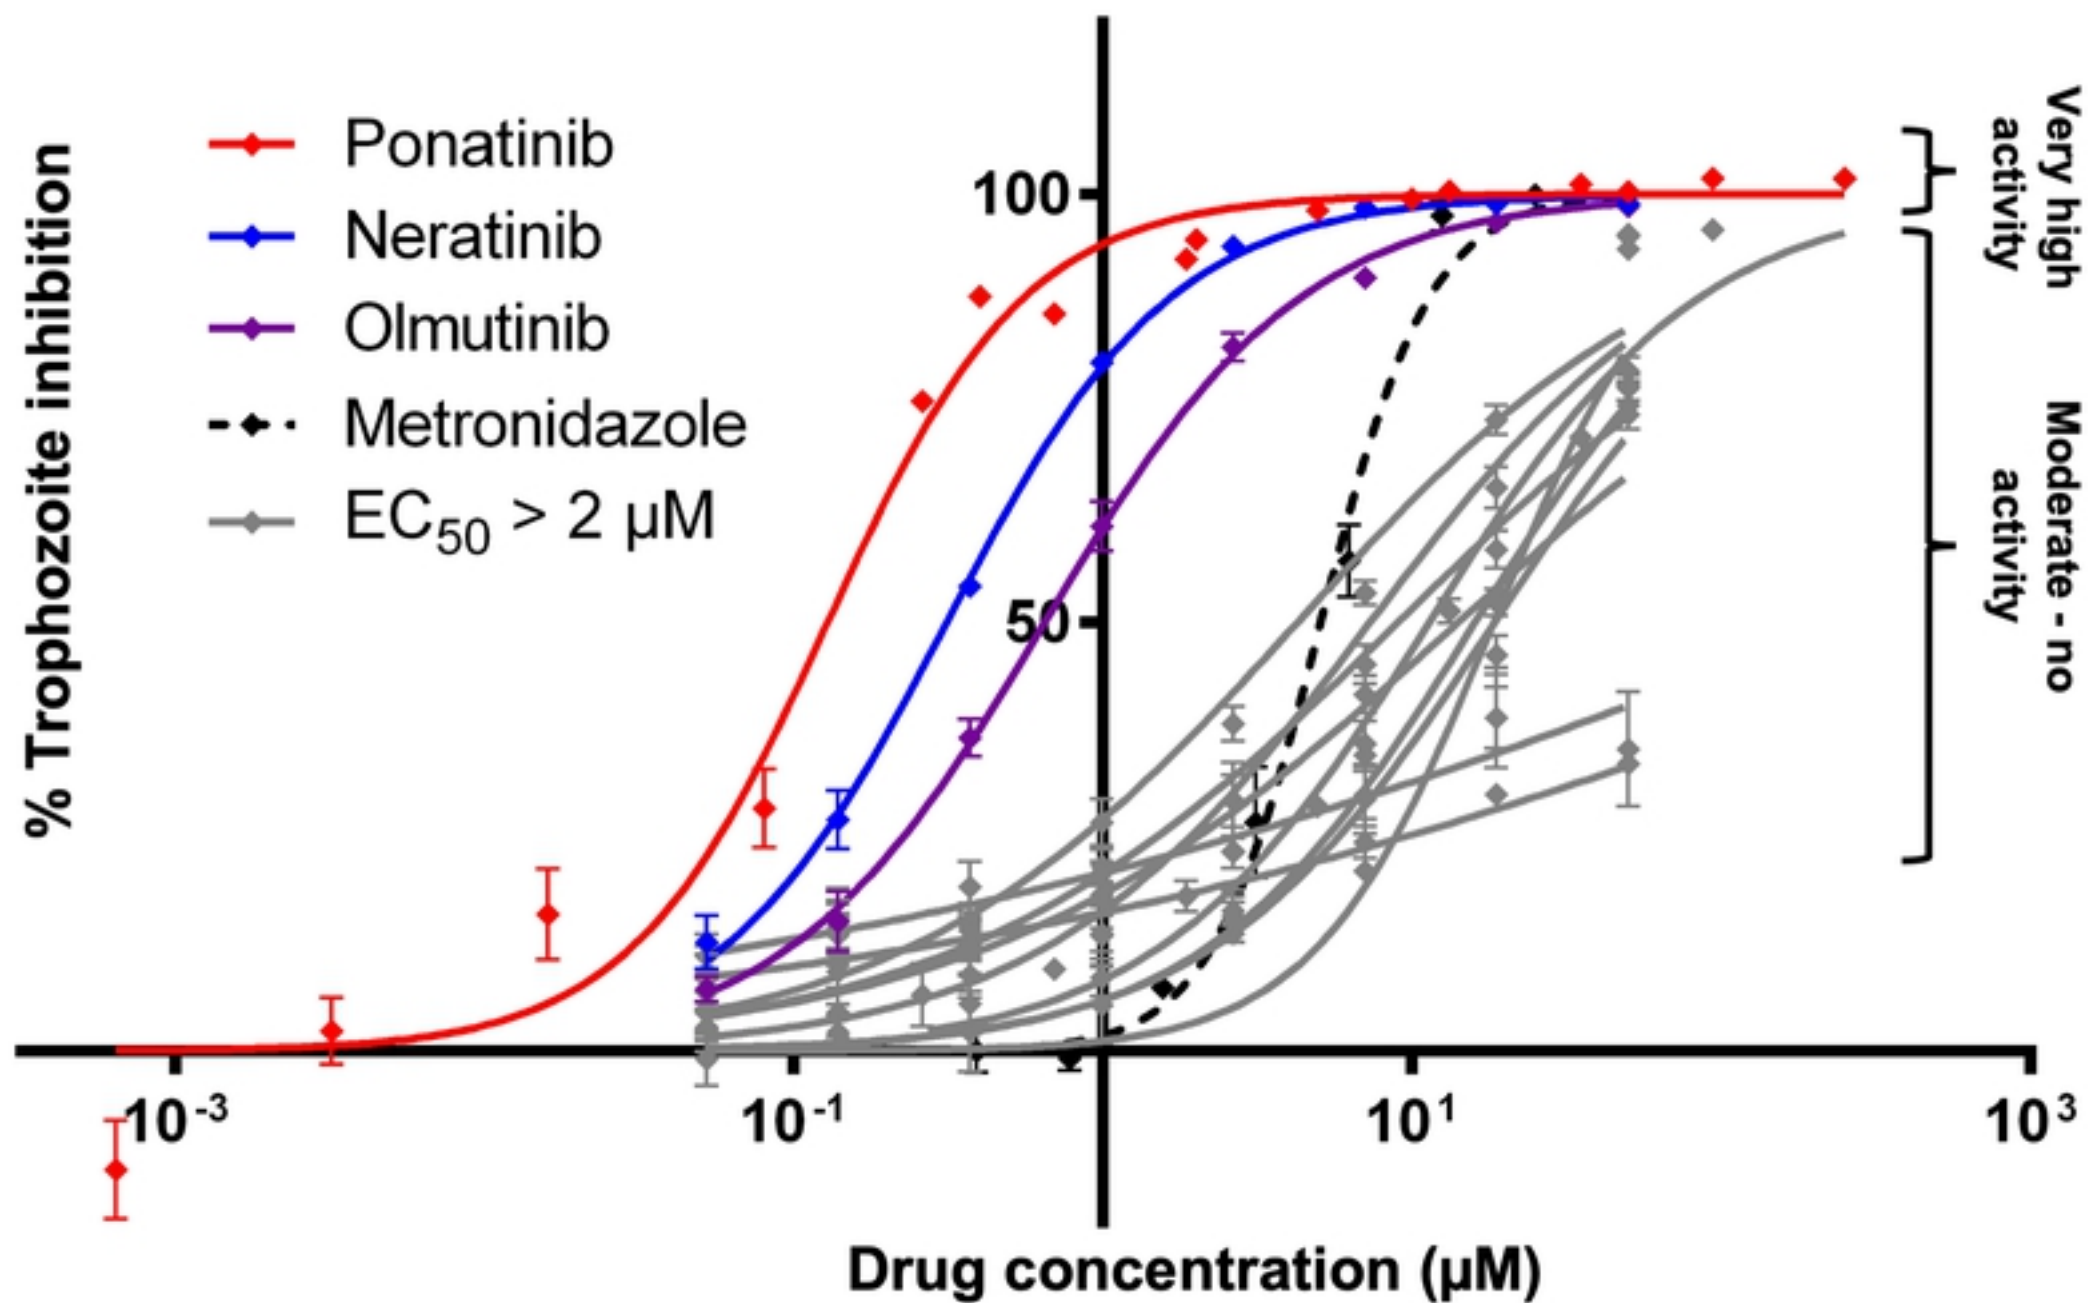

Fig 6



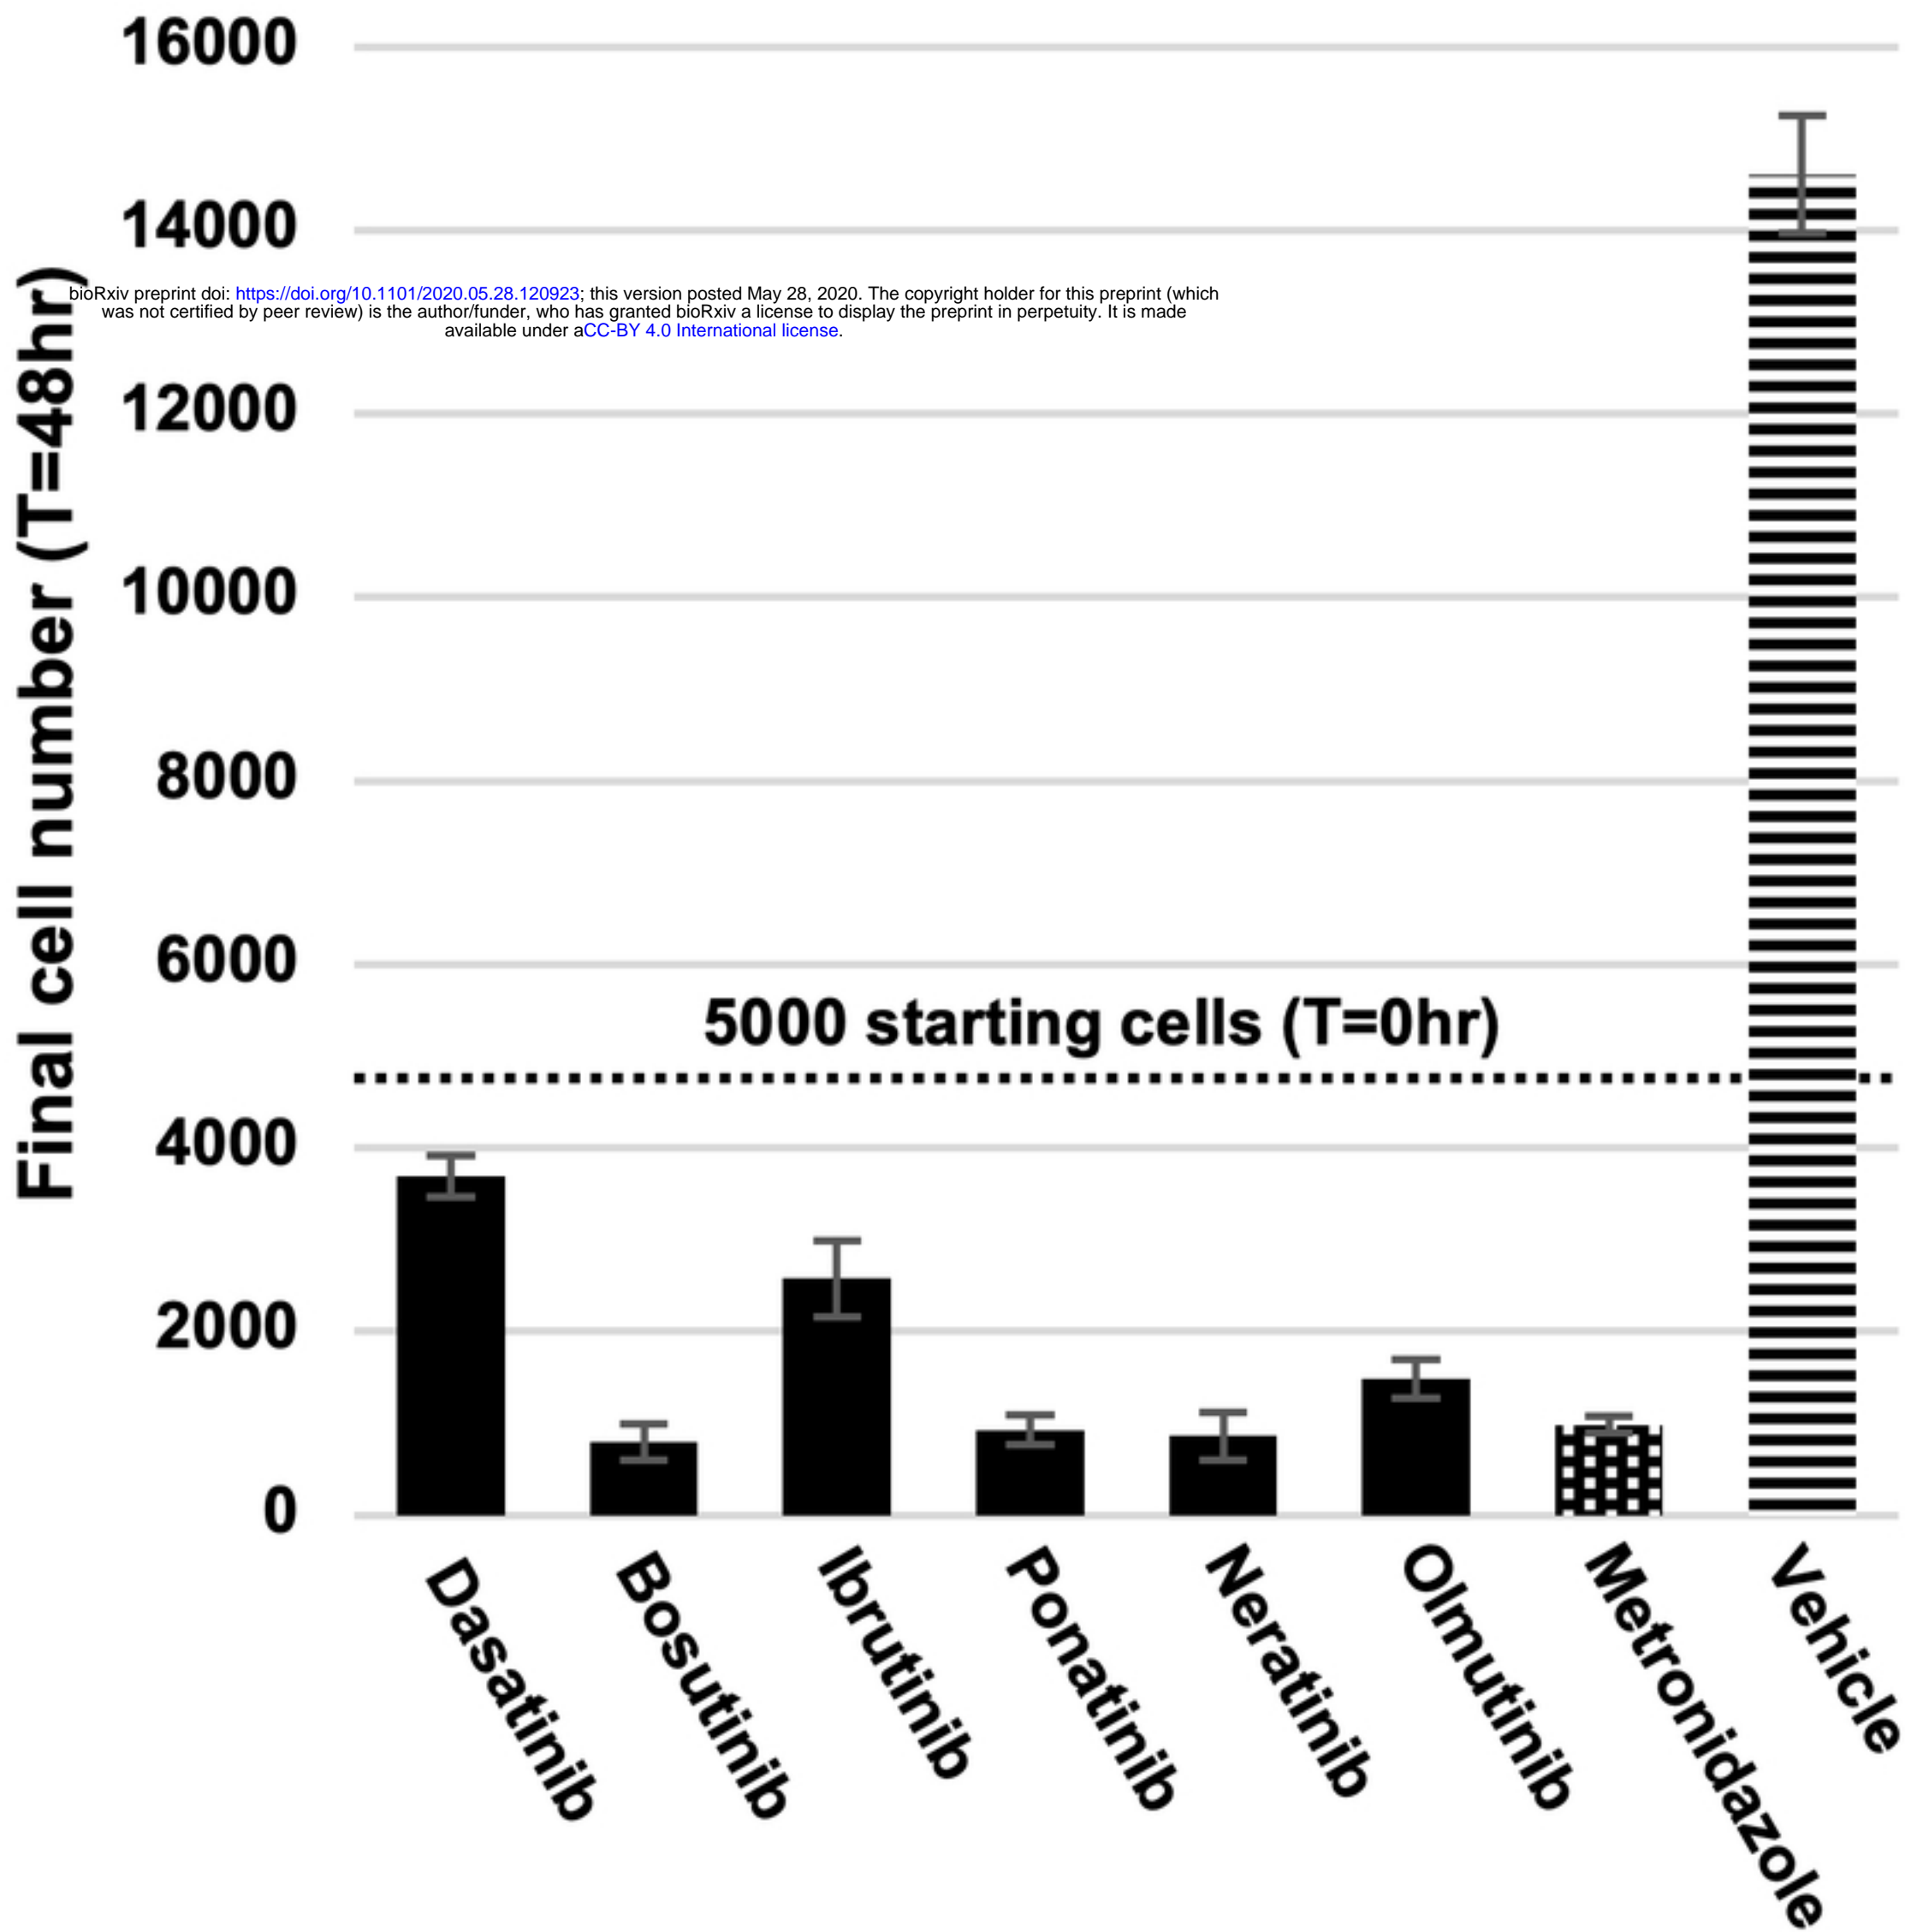

Fig 7

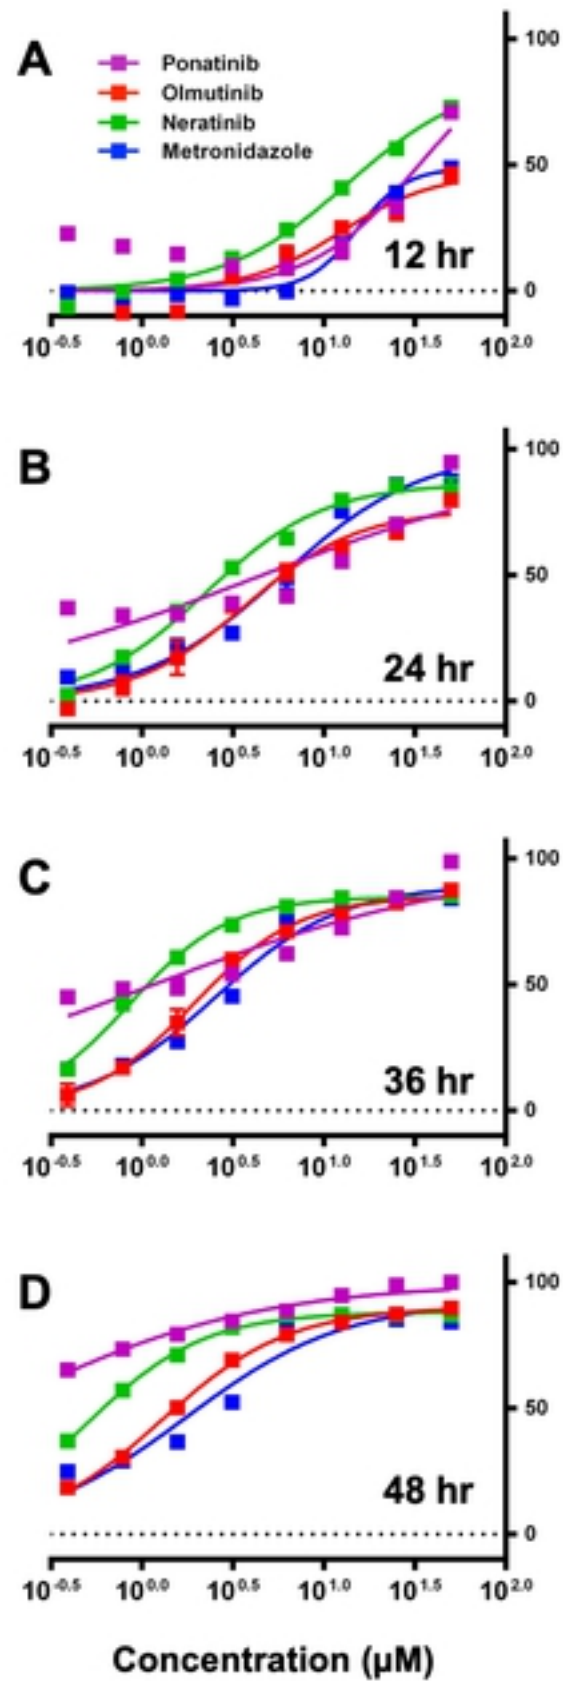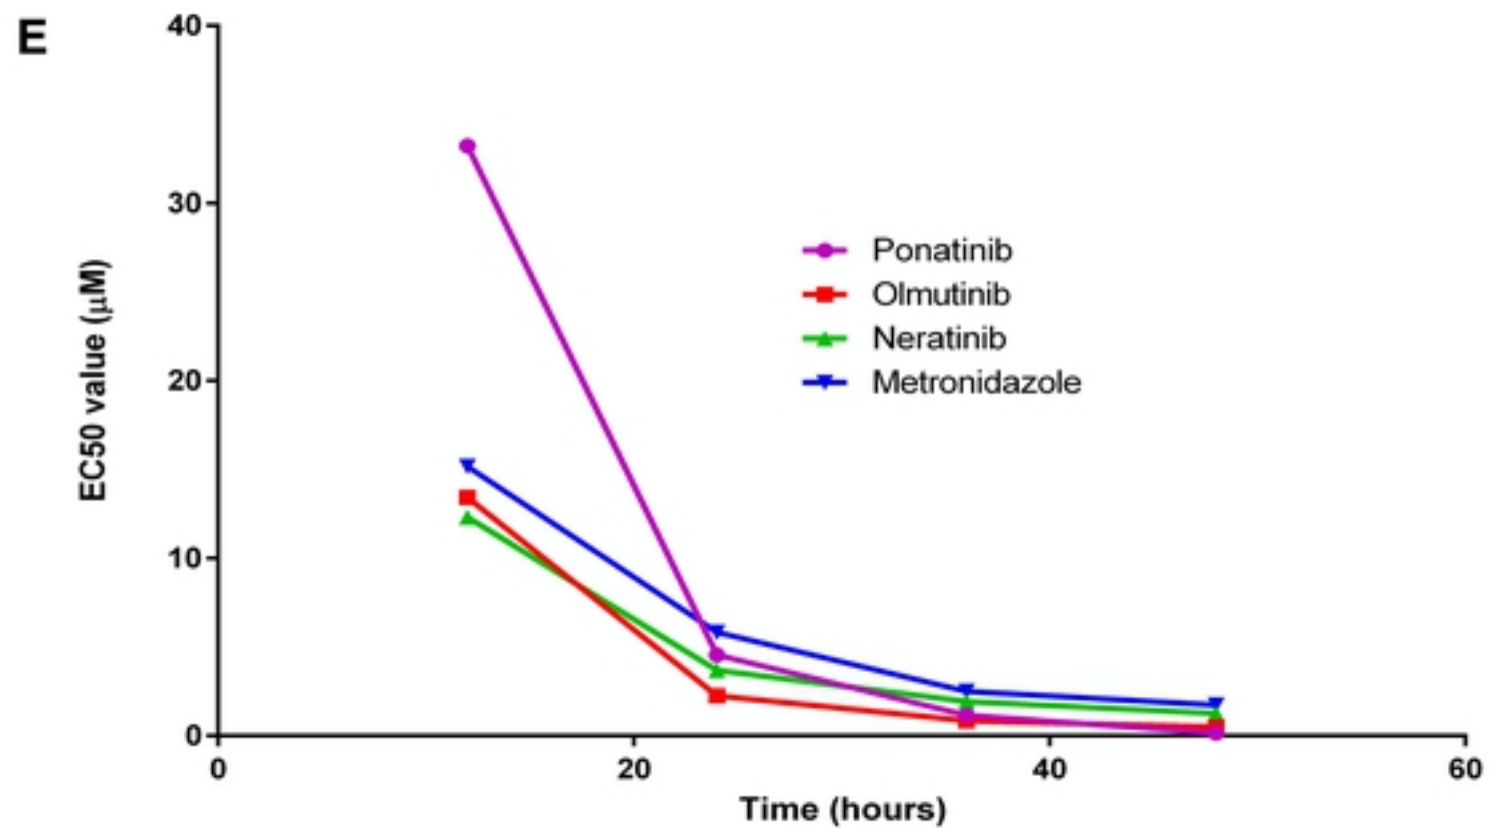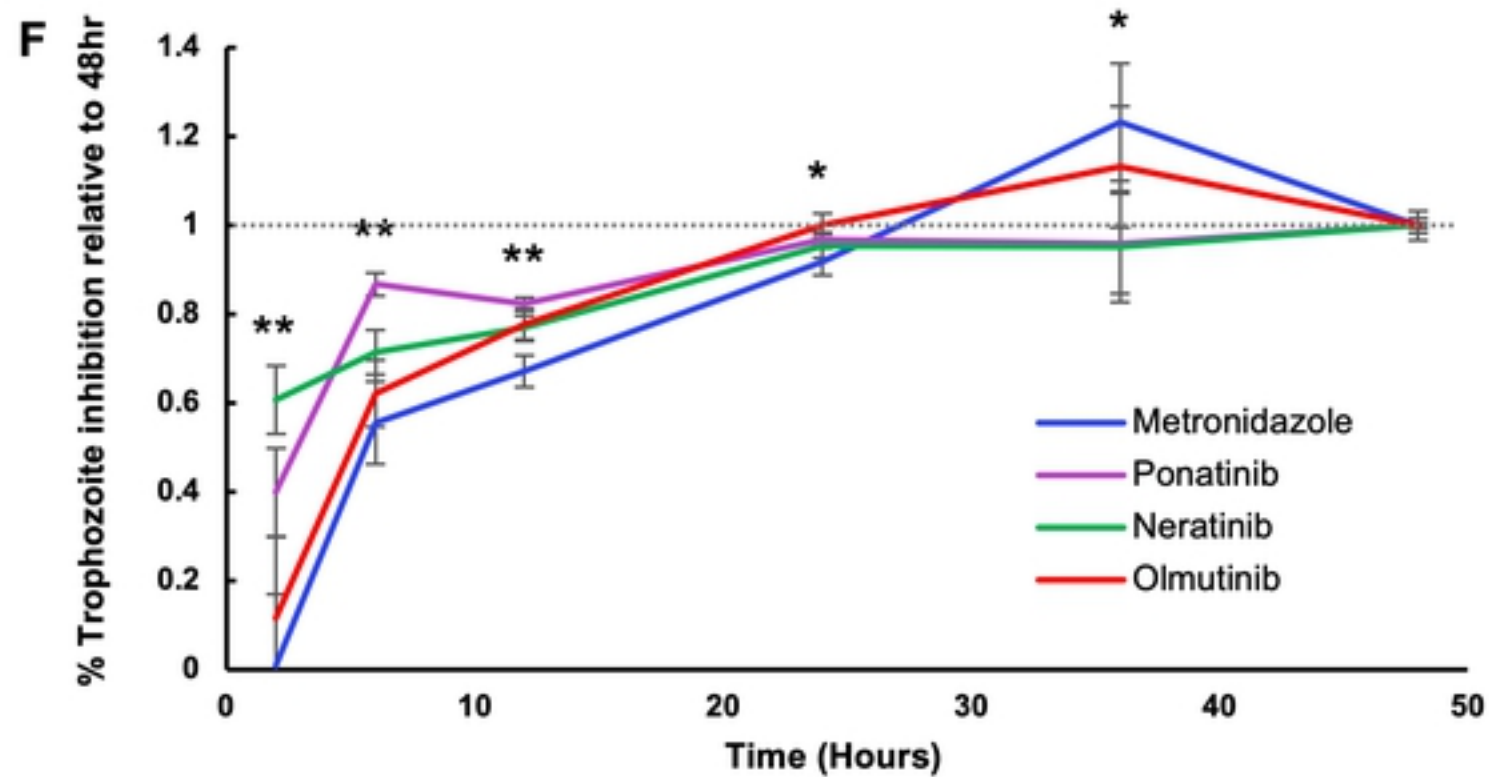

Fig 8

**% cyst survival relative to DMSO**

bioRxiv preprint doi: <https://doi.org/10.1101/2020.05.28.120923>; this version posted May 28, 2020. The copyright holder for this preprint (which was not certified by peer review) is the author/funder, who has granted bioRxiv a license to display the preprint in perpetuity. It is made available under aCC-BY 4.0 International license.

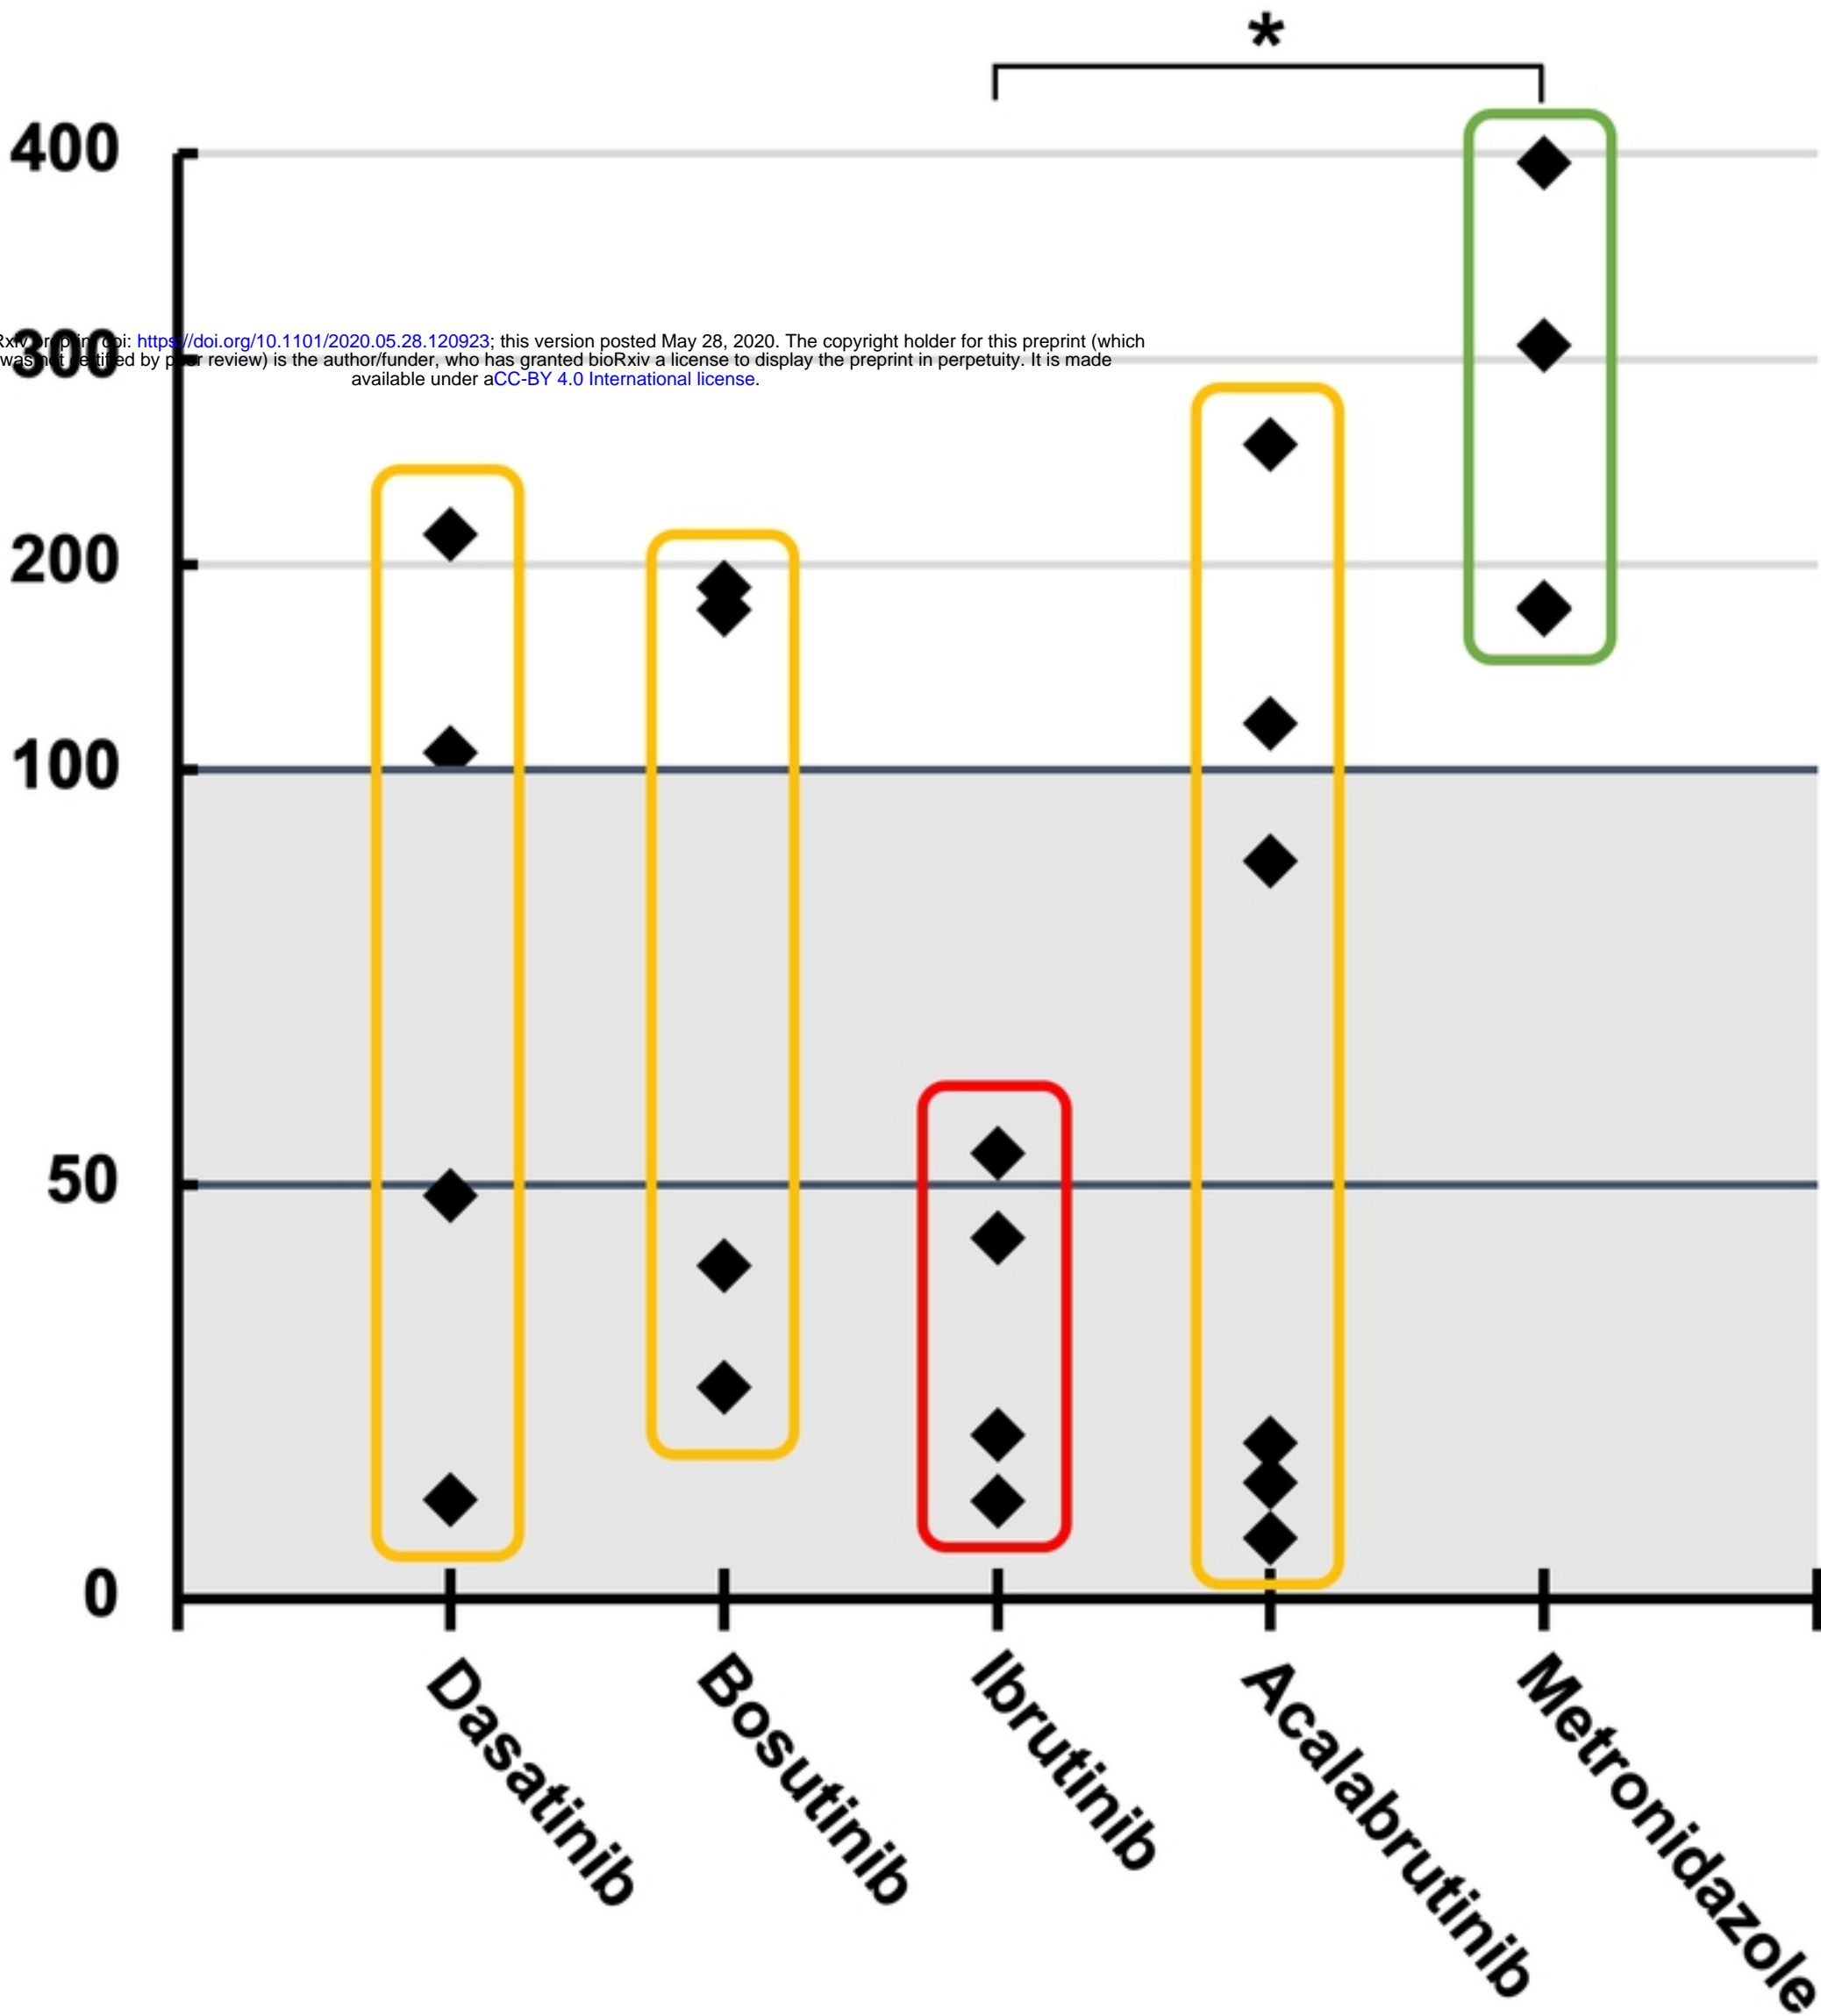

Fig 9
